1 **Manuscript Title:** Loss of *Prdm12* during development, but not in mature nociceptors, causes defects  
2 in pain sensation.

3 **Author names and affiliations:**

4 Mark A. Landy<sup>1</sup>, Megan Goyal<sup>1</sup>, Katherine M. Casey<sup>1</sup>, Chen Liu<sup>1,2</sup>, Helen C. Lai<sup>1\*</sup>

5 <sup>1</sup>Dept. of Neuroscience, UT Southwestern Medical Center, Dallas, TX 75390

6 <sup>2</sup>Dept. of Internal Medicine, Hypothalamic Research Center, Dallas, TX 75390

7 Corresponding author: Helen C Lai, [Helen.Lai@utsouthwestern.edu](mailto:Helen.Lai@utsouthwestern.edu) @LaiL4b

8

9 **Summary**

10 *Prdm12* is as a key transcription factor in nociceptor neurogenesis. Mutations of *Prdm12* cause  
11 Congenital Insensitivity to Pain (CIP) due to failure of nociceptor development. However, precisely how  
12 deletion of *Prdm12* during development or adulthood affects nociception is unknown. Here, we employ  
13 tissue- and temporal-specific knockout mouse models to test the function of *Prdm12* during  
14 development and in adulthood. We find that constitutive loss of *Prdm12* causes deficiencies in  
15 proliferation during sensory neurogenesis. We also demonstrate that conditional knockout from dorsal  
16 root ganglia (DRGs) during embryogenesis causes defects in nociception. In contrast, we find that in  
17 adult DRGs, *Prdm12* is dispensable for pain sensation and injury-induced hypersensitivity. Using  
18 transcriptomic analysis, we found unique changes in adult *Prdm12* knockout DRGs compared to  
19 embryonic knockout, and that PRDM12 is likely a transcriptional activator in the adult. Overall, we find  
20 that the function of PRDM12 changes over developmental time.

21 **Keywords**

22 *Prdm12*, pain, nociceptors, mouse, behavior, congenital insensitivity to pain, painlessness, DRG

23 **Introduction**

24 Nociception is a critical warning system for the detection of tissue damage by noxious stimuli,  
25 but it can often go awry, resulting in either greatly increased or decreased pain sensation. Patients with  
26 Congenital Insensitivity to Pain (CIP) are a prime example of the latter. These people cannot feel  
27 mechanical, thermal, or inflammatory pain, or even discomfort associated with internal injuries. Cases

28 of CIP have typically been associated with mutations of nerve growth factor (NGF) or its receptor *Ntrk1*  
29 (TRKA), which cause failure of nociceptor development (Capsoni et al., 2011; Carvalho et al., 2011;  
30 Einarsdottir et al., 2004), or in the voltage-gated sodium channels, *Scn9a* (Nav1.7) or *Scn11a* (Nav1.9)  
31 (Cox et al., 2006; Leipold et al., 2013). More recently, additional mutations have been identified to  
32 cause CIP (Nahorski et al., 2015), including those of the transcription factor PRDM12 (PRDI-BF1-RIZ  
33 homologous domain-containing family) (Chen et al., 2015). As in other forms of CIP, patients with  
34 *Prdm12*-associated CIP are unable to feel pain due to noxious chemical, thermal, or mechanical stimuli,  
35 but retain normal touch, proprioception, and tickle sensations (Chen et al., 2015; Saini et al., 2017;  
36 Zhang et al., 2016). Therefore, *Prdm12* or its downstream effectors may serve as potential novel  
37 analgesic targets similar to drugs that have been developed targeting other genes underlying CIP, NGF  
38 and Nav1.7 (Hoffman et al., 2011).

39 The PRDM family of transcription factors are known to have essential roles in cell fate transitions  
40 (Hohenauer and Moore, 2012) and many lines of evidence suggest that PRDM12 has an essential role  
41 in nociceptor development and maintenance. It is highly conserved from mouse to human, with 98%  
42 protein identity, suggesting a highly conserved function, and opening the gateway for study in mouse  
43 models. Indeed, consistent with the idea of having a highly conserved function, loss-of-function of  
44 PRDM12 in humans or its homologs in *Drosophila*, frog embryos, and mice leads to abnormalities in  
45 sensory neuron development (Bartesaghi et al., 2019; Chen et al., 2015; Desiderio et al., 2019; Moore et  
46 al., 2004; Nagy et al., 2015). Additionally, *Prdm12* is specifically expressed in myelinated A $\delta$ - and  
47 unmyelinated C-fiber nociceptors into adulthood (Chen et al., 2015; Kinameri et al., 2008; Matsukawa et  
48 al., 2015; Nagy et al., 2015; Sharma et al., 2020; Thelie et al., 2015; Usoskin et al., 2014). The highly  
49 conserved sequence, function, and expression pattern raise the possibility that PRDM12 is serving an  
50 important role in nociceptor biogenesis.

51 Structurally, PRDM12 consists of a PR domain, three zinc finger domains, and a polyalanine  
52 repeat. The PR domain is characteristic of all members of the PRDM family of proteins, and bears weak  
53 homology to SET domains, which have histone methyltransferase (HMT) activity (Kinameri et al., 2008).  
54 However, PRDM12 itself is reported to have weak endogenous HMT activity, and is thought to exert

55 repressive activity predominantly through interaction with EHMT2 (euchromatic histone-lysine N-  
56 methyltransferase, also called G9a), which catalyzes repressive chromatin marks (Yang and Shinkai,  
57 2013). This interaction was shown to be dependent on the second zinc finger domain (ZnF2), contained  
58 in exon V (Yang and Shinkai, 2013).

59 Thus far, most of the work surrounding *Prdm12* has focused on its role in nociceptor  
60 neurogenesis. Early reports indicated that PRDM12 promoted expression of sensory neuronal markers  
61 (Kinameri et al., 2008; Matsukawa et al., 2015; Thelie et al., 2015; Yang and Shinkai, 2013). Consistent  
62 with this, *Prdm12* was found to be necessary for the initiation and maintenance of tropomyosin receptor  
63 kinase A (TRKA) expression, a marker for early nociceptor development (Desiderio et al., 2019). In  
64 addition, in the absence of *Prdm12*, the entire nociceptor lineage failed to develop. However, the  
65 mechanism by which *Prdm12* knockout leads to a deficiency in nociceptors is unclear. Work by  
66 Bartesaghi et al. found evidence for decreased proliferation in *Prdm12* knockout mice with no change in  
67 cell death (Bartesaghi et al., 2019), while work from Desiderio et al. found the opposite, that there was  
68 no change in proliferation, but there was an increase in cell death (Desiderio et al., 2019). Differences in  
69 the way proliferation and cell death were quantitated in these studies could account for these  
70 discrepancies.

71 Therefore, in our study, we sought to further clarify the mechanism by which *Prdm12* controls  
72 nociceptor development. Furthermore, we wanted to examine the behavioral defects in mice that lack  
73 *Prdm12* during embryogenesis and determine whether it is an important component of pain sensation in  
74 mature sensory neurons. To do this, we generated three mouse models with which to study the effect of  
75 *Prdm12*-knockout at different timepoints: (1) *Prdm12*<sup>-/-</sup>, a constitutive knockout to assess the early  
76 embryonic changes resulting from *Prdm12* deletion, (2) *Prdm12*<sup>AvilCKO</sup>, a dorsal root ganglion (DRG)-  
77 specific conditional knockout to assess pain sensation in mice lacking *Prdm12* from around E12.5  
78 onwards, and (3) *Prdm12*<sup>AvilERT2CKO</sup>, a tamoxifen-inducible DRG-specific conditional knockout to  
79 investigate the role of *Prdm12* in adult nociceptors. With these models, we confirm that *Prdm12*  
80 expression is necessary for the development of nociceptors, and show that its absence results in defects  
81 in proliferation during neurogenesis. Furthermore, we demonstrate that embryonic sensory neuron-

82 specific knockout of the gene results in mice with defects in mechanical and cold nociception, as well as  
83 itch. Finally, we show that knockout of *Prdm12* in mature DRGs does not impact nociception, even under  
84 conditions of neuropathic injury or inflammation. However, we provide transcriptomic evidence for an  
85 alternate function of *Prdm12* in these neurons compared to embryonic development and that it is  
86 potentially an activating transcription factor in the adult rather than a repressor.

87

## 88 **Materials & Methods**

### 89 *Mouse strains*

90 The following mouse strains were used: *Prdm12<sup>F/F</sup>* (Chen et al., 2020), CAG-Cre (Sakai and  
91 Miyazaki, 1997), *Advillin<sup>Cre/+</sup>* (JAX#032536) (Hasegawa et al., 2007), *R26<sup>LSL-tdTomato/+</sup>* (Ai14, JAX#007908)  
92 (Madisen et al., 2010), *Avi<sup>CreERT2</sup>BAC* (JAX#032027) (Lau et al., 2011), *R26<sup>LSL-EYFP/+</sup>* (Ai3, JAX#007903).  
93 All mice were outbred and thus are mixed strains (at least C57Bl/6J, C57Bl/6N, and ICR). Both male and  
94 female mice were used for all studies. No sex differences were noted for any quantified data, therefore  
95 sexes of the same genotype were pooled for analysis. Mice crossed to *Advillin<sup>Cre/+</sup>* always included a  
96 fluorescent reporter and were screened for “dysregulated” expression. Normal fluorescence is visible in  
97 the trigeminal and dorsal root ganglia of pups within the first three days after birth, while dysregulation  
98 results in patchy fluorescence of the whole body. Mice expressing *Avi<sup>CreERT2</sup>BAC* were injected with  
99 tamoxifen (Sigma) at eight weeks of age. Injections were given over a period of five days (1/day,  
100 120mg/kg delivered intraperitoneally (i.p.) as a 40mg/ml solution dissolved in sunflower oil with 10%  
101 ethanol) (Lau et al., 2011; Sikandar et al., 2018). All animal experiments were approved by the  
102 Institutional Animal Care and Use Committee at UT Southwestern.

### 103 *Behavior assessments*

104 For all behavioral tests, animals were habituated for 30 min one day before testing, and again  
105 immediately prior to testing. A single experimenter conducted all tests and was blinded to genotype. The  
106 subsequent statistical analyses included all data points; no methods were used to predetermine sample  
107 sizes. Littermates were used as controls.

### 108 *von Frey mechanical Sensitivity*

109 von Frey withdrawal thresholds were determined using the simplified up-down method (Bonin et  
110 al., 2014). After acclimation in plastic chambers with wire mesh flooring, mice were tested with graded  
111 filaments from 0.008 to 2.0 g applied for ~3 sec to the plantar hindpaw with at least 5 min between each  
112 application. Responses on both the left and right paw were recorded. Toe spreading, flinching, or licking  
113 was recorded as a positive response.

#### 114 *Tail clip and Pinprick*

115 Mechanical nociception was assessed using the tail clip and pinprick assays. For tail clip,  
116 electrical tape was wrapped around the jaws of a 1 cm binder clip, which was then attached to the tail,  
117 about 1 cm from the rostral end. The latency to response (biting or clawing at the clip, or otherwise trying  
118 to remove it) was recorded for a single trial, with a cutoff of 10 seconds. Pinprick was performed using  
119 0.2 mm insect pins (FST 26002-20) to deliver a sharp mechanical stimulus. Mice were again acclimated  
120 in plastic chambers, then challenged 10 times on each paw, with 10 min between each trial. Positive  
121 responses (paw flinching, licking, or vocalization) was recorded and reported as a percentage of total  
122 trials.

#### 123 *Rodent Pincher*

124 The inflamed paw in the CFA inflammation model was tested with the Rodent Pincher Analgesia  
125 Meter (Bioseb). Mice were restrained by wrapping the mouse inside a paper towel with the inflamed paw  
126 exposed. The pincher was used to apply ramping pressure until a response (paw withdrawal or flicking,  
127 or vocalization) was observed. Three recordings were made per mouse, spaced at least 10 min apart.

#### 128 *Heat sensitivity (hot plate and Hargreaves)*

129 For hot plate, mice were placed directly on the plate (IITC) set to the designated temperature.  
130 The latency to response (hindpaw licking or flicking, or jumping) was recorded and averaged over three  
131 trials. Cutoff times were used to prevent injury as follows: 1 min for 50°C, 45 sec for 52°C, and 30 sec for  
132 55°C. For Hargreaves, mice were acclimated on a heated (30°C) glass surface (IITC), then exposed to a  
133 beam of radiant heat following the standard Hargreaves method. Beam intensity was adjusted to result  
134 in latency of ~10 sec in wildtype animals. Paw withdrawal latency was recorded for 3 exposures per paw,

135 with at least a 5 min interval between exposures. A cutoff time of 30 seconds was used to prevent tissue  
136 damage.

#### 137 *Cold sensitivity assays*

138 Cold nociception was measured using either the cold plate or cold plantar assay. For cold plate,  
139 a cooling block was chilled at -20°C, then allowed to warm until the surface temperature reached 0°C as  
140 measured by an infrared thermometer. Mice were placed on the plate, and the latency to response  
141 (hindpaw licking or flicking, or jumping) was recorded and averaged over three trials. A cutoff time of 60  
142 seconds was used to prevent injury. The cold plantar assay was performed using dry ice loaded into a  
143 syringe to stimulate the hindpaw (Brenner et al., 2012). Mice were placed on a thin, single pane of glass,  
144 and the tip of the dry ice pellet was pressed against the glass under the hindpaw. Withdrawal latency was  
145 recorded for 3 exposures per paw, with at least 5 min interval between exposures. A cutoff time of 30  
146 seconds was used to prevent tissue damage.

#### 147 *Itch assays*

148 Itch sensation was measured by pruritogen injection into the nape of the neck (Kuraishi et al.,  
149 1995; Shimada and LaMotte, 2008). The injection area was shaved one day prior to testing. On the day  
150 of testing, mice were habituated in cylindrical containers for 30 minutes, then injected with 20  $\mu$ L of  
151 histamine (100  $\mu$ g/ $\mu$ L) or chloroquine (200  $\mu$ g/ $\mu$ L) dissolved in PBS. The mice were video recorded for  
152 30 min following pruritogen injection, and the videos were subsequently scored to determine total time  
153 spent scratching the injected area.

#### 154 *Capsaicin test*

155 The capsaicin test was performed by intraplantar injection to one hindpaw of 10  $\mu$ L containing 0.3  
156  $\mu$ g/ $\mu$ L capsaicin (Sigma M2028) in 0.9% saline/10% ethanol/10% Tween-20 following acclimation. Mice  
157 were then video recorded for 10 minutes, and the videos were subsequently scored to determine time  
158 spent licking the injected paw.

#### 159 *Touch assays*

160 Non-nociceptive touch sensation was measured using the dynamic brush and sticky tape assays.  
161 For dynamic brush assay, were again acclimated in von Frey chambers. The tip of a cotton tipped

162 applicator (Henry Schein) was teased apart to “fluff” it up and ensure no filaments were sticking straight  
163 up. The swab was then lightly brushed across the plantar surface of the hindpaw (about 1 s from heel to  
164 toe) 10 times per paw, with 10 min between each trial. Positive responses (paw flicking or withdrawal)  
165 are reported as a percentage of total trials. For sticky tape, a 5 mm x 5 mm piece of lab tape (Fisher) was  
166 adhered to the plantar surface of the hindpaw, and the mouse was allowed to freely explore its enclosure.  
167 Latency to removal of the tape was recorded and averaged across two trials per paw.

#### 168 *Injury and inflammation*

169 SNI surgery was performed as previously described (Decosterd and Woolf, 2000). Briefly, under  
170 3% isoflurane anesthesia, the left sciatic nerve was exposed where it branches into the sural, tibial, and  
171 common peroneal nerves. The tibial and common peroneal nerves were tightly ligated using 5.0 silk  
172 suture, and a ~3 mm section of nerve was removed just distal to the knot. Mice were allowed to recover  
173 for at least 48 hours prior to testing. For CFA-induced inflammation, 20  $\mu$ L of Complete Freund’s Adjuvant  
174 (Sigma F5881) was injected into the plantar surface of the left hindpaw. Mice were first tested 6 hours  
175 post-injection to allow for development of the inflammatory response.

#### 176 *Tissue processing*

177 Pregnant dams were injected with 0.5 mg/mL EdU (5-ethynyl-2'-deoxyuridine, Carbosynth) at a  
178 dose of 10  $\mu$ g EdU/g mouse 30 minutes prior to CO<sub>2</sub> euthanasia for collection of embryos (Wang et al.,  
179 2011). Embryos fixed in 4% paraformaldehyde (PFA) in PBS for 2 hours at 4°C, washed overnight in  
180 PBS, and cryoprotected in 30% sucrose. Adult mice were anesthetized with Avertin (2,2,2-  
181 Tribromoethanol) (0.025 – 0.030 mL of 0.04 M Avertin in 2-methyl-2-butanol and distilled water/g mouse)  
182 and transcardially perfused, first with 0.012% w/v Heparin/PBS and then 4% PFA/PBS. A dorsal or ventral  
183 laminectomy exposed the spinal cord and DRGs for a post-fix in 4% PFA (2 hours at 4°C). Tissue was  
184 then washed in PBS and cryoprotected in 30% sucrose before the laminectomy was performed on the  
185 reverse side, allowing DRGs to be removed and embedded in OCT (Tissue-Tek Optimal Cutting  
186 Temperature Compound). All tissue was sectioned using a Leica CM1950 cryostat.

#### 187 *Immunohistochemistry (IHC) and confocal imaging*

188 Cryosections (20-30  $\mu\text{m}$  were blocked with PBS/1% normal goat or donkey serum (Jackson  
189 labs)/0.3% Triton X-100 (Sigma) for up to 1 hr at room temperature (RT), then incubated overnight with  
190 primary antibody at 4°C. Sections were washed 3 times in PBS, then the appropriate secondary antibody  
191 (Alexa 488, 567, and/or 647, Invitrogen) was incubated for an hour at RT, and sections were again  
192 washed 3 times in PBS. For development of EdU signal, sections were then re-permeabilized in 0.5%  
193 Triton X-100 for 30 min at RT, then incubated in EdU detection solution (100 mM Tris pH 7.5, 4 mM  
194  $\text{CuSO}_4$ , 100 mM sodium ascorbate, 5  $\mu\text{M}$  sulfo-Cy3 azide (Lumiprobe)) for 30 min at RT, and rinsed 3  
195 times in PBS. Slides were mounted with Aqua-Poly/Mount (Polysciences Inc.), and coverslipped (Fisher).  
196 The following primary antibodies and dilutions were used: mouse anti-Islet1/2 (1:20,000; DSHB 39.4D5),  
197 goat anti-TRKA (1:20; R&D Systems AF1056), rabbit anti-RUNX3 (1:50,000; gift from Thomas Jessell),  
198 rabbit anti-CASP3 (1:50; BD Pharmingen 557035), IB4-488 (1:500, Invitrogen I21411), rabbit anti-CGRP  
199 (1:1000; Immunostar 24112), rabbit anti-NF200 (1:500; Sigma N4142), rabbit anti-TRPV1 (1:500;  
200 Alomone ACC-030).

201 Fluorescent images were taken on a Zeiss LSM880 confocal microscope with a 3  $\mu\text{m}$  optical slice  
202 and the 20x objective. Images were pseudocolored with a magenta/yellow/cyan color scheme using  
203 Adobe Photoshop (Adobe) or Fiji. Cell counts were conducted manually using the built-in cell counter  
204 plugin on Fiji.

#### 205 *In situ hybridization*

206 A probe for ISH was generated targeting a 482 bp sequence entirely within exon V of *Prdm12*.  
207 ISH was performed as per standard protocols. Detailed protocol is available upon request. Briefly, DRG  
208 sections (30  $\mu\text{m}$ ) were dried at 50°C for 15 min then fixed in 4% PFA in DEPC-PBS for 20 min at RT.  
209 The sections were washed in DEPC-PBS for 5 min at RT then incubation in RIPA buffer (150 mM NaCl,  
210 1% NP-40, 0.5% Na deoxycholate, 0.1% SDS, 1 mM EDTA, 50 mM Tris pH 8.0) for 60 min. The  
211 sections were then washed in DEPC-water followed by acetylation (500  $\mu\text{L}$  of acetic anhydride in 200  
212 mL of 0.1 M RNase-free triethanolamine-HCl at pH 8.0), washed in DEPC-PBS for 5 min., and  
213 prehybridized for 4 h at 64°C. Sections were incubated overnight at 64°C with 1–2 ng/ $\mu\text{L}$  of fresh  
214 *Prdm12* probe. The following day, a series of low and high stringency washes in 2x and 0.2X SSC as  
8



215 well as treatment with RNaseA and RNase T1 were performed. The sections were blocked in 10%  
216 inactivated sheep serum for 1 h followed by overnight incubation with 1:1000 anti-digoxigenin (DIG)  
217 antibody (Roche). The sections were washed in PBT and incubated with NBT/BCIP (Roche) staining  
218 solution until the blue precipitate formed. The slides were then washed in PBS and coverslipped with  
219 Aqua-Poly/Mount (Polysciences Inc.) mounting media. If ISH was followed by IHC, the sections were  
220 placed in PBS and then immunostained following the IHC protocol described above.

221 The RNAscope Fluorescent Multiplex Assay (Advanced Cell Diagnostics Inc., Hayward, CA)  
222 was performed according to the manufacturer's instructions using a *Prdm12* exon V-specific probe  
223 (ACDBio, 320269-C3). All incubation steps were performed in a HybEZ™ II oven set to 40°C. The  
224 slides were washed with distilled water three times and incubated with Protease III for 40 sec. Slides  
225 were then washed with distilled water three times and incubated with the probe targeting *Prdm12* for 2  
226 hours. The slides were washed two times thoroughly using 1X wash buffer for 2 min, then incubated  
227 with Amp 1-FI for 30 minutes. The same process (washing then treatment) was repeated for Amp 2-FI,  
228 Amp 3-FI and Amp 4-FI for 15, 30 and 15 minutes, respectively. Slides were washed three times in PBS  
229 for 10 minutes and coverslipped with Aqua-Poly/Mount (Polysciences, Inc.) mounting media.

### 230 *Microarrays*

231 RNA was extracted from lumbar DRGs 2-5 following the manufacturer's protocol with a Direct-  
232 zol RNA Miniprep Plus kit (Zymo R2071). RNA libraries were prepared and sequenced by the UTSW  
233 Microarray core facility on an Illumina NextSeq SE-75 sequencer at 40 million reads/sample. RNA-seq  
234 reads were mapped to mouse genome (mm10) and junctions were identified using tophat(v2.1.2) (Kim  
235 et al., 2013). Differential expression analysis was performed using cufflinks (v.2.2.1) (Trapnell et al.,  
236 2013). Both alignment and differential expression analysis were performed using default parameters.  
237 From differential expression results, genes showing expression of  $\geq 1$  FPKM in either of the conditions  
238 cutoff was used in addition to FDR and fold change cutoffs.

### 239 *Experimental design and statistical tests*

240 Cell counts were averaged across sections from 3 unique lumbar (L2-L5) DRGs per specimen,  
241 with 2-3 embryos or mice per timepoint or condition as indicated. Where applicable, counts were taken

242 as a fraction of DRG area (measured in Fiji), or as a percentage of TOM<sup>+</sup> cells. For both cell counts and  
243 behavior assessment, statistical analysis was conducted with the student's t-test for pairwise  
244 comparisons, or with a 2-way ANOVA when analyzing data over time. All data and graphs were  
245 processed in Microsoft Excel 2015 and GraphPad Prism 8. Mean ± SEM is reported throughout the  
246 manuscript. Note that SEM for n=2 equals the range between the two points.

247

## 248 **Results**

249 *Prdm12* exon V constitutive knockout mice show selective loss of the developing nociceptor population.

250 To study the role of *Prdm12* during embryogenesis, we first generated homozygous null mice in  
251 which exon V was deleted from conception. This was done by crossing mice expressing an exon V floxed  
252 *Prdm12* allele (Fig. 1A-B) (Chen et al., 2020) to germline CAG-Cre mice (Sakai and Miyazaki, 1997),  
253 generating heterozygous *Prdm12*<sup>+/-</sup> mice, which were then crossed to each other, producing *Prdm12*<sup>-/-</sup>  
254 homozygotes. Using *in situ* hybridization with a probe specific for exon V, we confirmed that expression  
255 of this sequence was eliminated from mutant DRGs at E11.5 (Fig. 1C). *Prdm12*<sup>-/-</sup> embryos appear grossly  
256 normal during development, and were observed to move and breathe normally immediately following  
257 cesarean section at E18.5, but newborn pups die within hours of birth. On closer examination, lumbar  
258 DRGs from *Prdm12*<sup>-/-</sup> embryos were found to be smaller than those of control littermates (Fig. 1D). The  
259 relative size of mutant DRGs to control DRGs shrank from ~68% at E11.5 to ~43% at E18.5 (Fig. 1D).

260 To identify what cellular changes occurred to result in smaller *Prdm12*<sup>-/-</sup> DRGs, we analyzed how  
261 the number and types of neurons were affected. We performed immunohistochemistry with the pan-  
262 sensory neuron transcription factor, ISLET1 (ISL1), which defines differentiated sensory neurons, and  
263 TRKA, a specific marker for nociceptors (Fig. 1E-H) (Moqrich et al., 2004; Smeyne et al., 1994). We  
264 found that the number of neurons (ISL<sup>+</sup>) was unchanged at early embryonic time points (E11.5 and  
265 E12.5), but significantly decreased at later embryonic time points (E13.5 and E18.5) (Fig. 1E-F). In  
266 contrast, TRKA was completely absent at all timepoints in *Prdm12*<sup>-/-</sup> mice, indicating the entire nociceptor  
267 lineage was lost. Notably, the number of ISL1<sup>+</sup> and TRKA<sup>+</sup> cells in control DRGs increases at E13.5,  
268 while remaining constant in KO embryos (Fig. 1F, H). Given that myelinated neurons are born before the

269 unmyelinated neurons during DRG neurogenesis, we surmise that the sudden increase of ISL1<sup>+</sup> and  
270 TRKA<sup>+</sup> neurons in control tissue at E13.5 is due to the differentiation of the main pool of nociceptive  
271 neurons (Kitao et al., 2002; Lawson and Biscoe, 1979; Ma et al., 1999).

272 Because TRKA<sup>+</sup> nociceptors were completely absent from the DRG at all embryonic time points,  
273 we wanted to test whether there was a compensatory increase in alternate cell fates. To investigate the  
274 effect of *Prdm12*-knockout on non-nociceptive sensory lineages, we stained DRGs for RUNX3 (runt-  
275 related transcription factor), which marks early proprioceptive neurons (Fig. 1I) (Inoue et al., 2002;  
276 Kramer et al., 2006; Levanon et al., 2002). While numbers of RUNX3<sup>+</sup> cells trended lower in KO tissue  
277 at all timepoints, no significant differences between control and KO were noted. In fact, average RUNX3  
278 levels were relatively constant from E11.5 to E13.5 (Fig. 1J) (Lallemend and Ernfors, 2012). Therefore,  
279 proprioceptor development is unaffected indicating that the fate of nociceptors do not switch to  
280 proprioceptors in *Prdm12*<sup>-/-</sup> mice. Overall, our data suggest that absence of *Prdm12* during neurogenesis  
281 results in selective loss of the nociceptor population, while proprioceptive DRG neurons develop normally,  
282 consistent with reports in *Prdm12* exon II KO mice (Bartesaghi et al., 2019; Desiderio et al., 2019).

283 *Nociceptors fail to proliferate and differentiate in Prdm12<sup>-/-</sup> embryos.*

284 We next sought to examine the developmental mechanism by which nociceptors are lost in  
285 *Prdm12*<sup>-/-</sup> embryos. Two previous studies using a *Prdm12* exon II KO mouse suggest two possibilities:  
286 (1) nociceptors die by apoptosis (Desiderio et al., 2019), or (2) precursors fail to proliferate (Bartesaghi  
287 et al., 2019). To address these possibilities in our mouse model, we examined the changes in apoptosis  
288 using the marker cleaved caspase-3 and in proliferation using a thymidine analog (Fig. 2). We found that  
289 the total number of apoptosing cells was unchanged or even reduced at E12.5 in *Prdm12*<sup>-/-</sup> embryos  
290 compared to controls (Fig. 2B). When normalized to DRG size, however, no significant differences were  
291 noted between control and *Prdm12*<sup>-/-</sup> mice, suggesting that the overall rate of apoptosis was similar  
292 between groups (Fig. 2C). It is particularly notable that no difference was seen at E13.5, as an increase  
293 in apoptosis at this timepoint would specifically point to death of the newly ISL1<sup>+</sup>, TRKA<sup>+</sup> cells normally  
294 present in controls (Fig. 1). Thus, it does not appear that nociceptors or their precursors are dying in  
295 increased numbers.

296 We next looked at the effect of *Prdm12*-knockout on proliferation of sensory neuron precursor  
297 cells. To do this, we i.p. injected the thymidine analog 5-ethynyl-2'-deoxyuridine (EdU) into pregnant  
298 dams half an hour prior to collecting embryos to label proliferating cells at each time point. Using  
299 immunohistochemistry to visualize EdU-labeled cells, we found that the total number of EdU<sup>+</sup> cells is  
300 significantly reduced in *Prdm12*<sup>-/-</sup> DRGs at E11.5 (Fig. 2D-E). Thus, we infer that the progenitors that  
301 would make TRKA<sup>+</sup> nociceptors are not present at E11.5, resulting in an overall decrease in the total  
302 number of proliferating cells (Fig. 2E). Furthermore, total EdU levels are similar in control and *Prdm12*<sup>-/-</sup>  
303 DRGs at E12.5 and E13.5, indicating that non-nociceptive lineages are proliferating normally. When  
304 normalized to DRG size, there appears to be a significant increase in relative proliferation at E12.5 and  
305 E13.5 in *Prdm12*<sup>-/-</sup> tissue, but this is because the DRGs are smaller due to the absence of nociceptors  
306 (Fig. 2F). Our findings are consistent with what Bartesaghi et al. describe in a constitutive *Prdm12* exon  
307 II knockout model showing a reduction in proliferation using phospho-histone H3 (pH3) staining  
308 (Bartesaghi et al., 2019). In summary, we have shown that *Prdm12* likely plays a role in the proliferation  
309 of progenitors that become nociceptors while proliferation of non-nociceptive populations is unchanged.  
310 *Prdm12*<sup>AvilCKO</sup> mice have reduced cold and mechanical sensitivity, and pruriception

311 The above evidence, as well as the human phenotype of *Prdm12*-associated CIP suggest that  
312 loss of *Prdm12* results in insensitivity to pain due to a failure of development of nociceptive neurons  
313 (Chen et al., 2015). To test this hypothesis, we examined whether deletion of *Prdm12* leads to a painless  
314 phenotype. Because *Prdm12*<sup>-/-</sup> mice die neonatally, we used a conditional knockout approach to  
315 specifically target sensory neurons using *Advillin*<sup>Cre/+</sup> knockin mice (Hasegawa et al., 2007; Zhou et al.,  
316 2010). While *Advillin* protein is reported to be enriched in non-peptidergic isolectin B4 (IB4<sup>+</sup>) nociceptors  
317 (Hunter et al., 2018), our findings suggest the CRE recombinase in the *Advillin*<sup>Cre/+</sup> knockin mice is broadly  
318 expressed in almost all DRG neurons, including those expressing *Prdm12* mRNA (see Fig. S1).  
319 Furthermore, although *Advillin* is reported to be expressed in other tissues, including endocrine cells,  
320 Merkel cells, and sympathetic ganglia (Hunter et al., 2018), *Prdm12* is not expressed in these tissues  
321 and thus, deletion in these tissues should not affect a nociceptive phenotype (Chen et al., 2015; Kinameri  
322 et al., 2008; Matsukawa et al., 2015; Nagy et al., 2015). We therefore crossed *Advillin*<sup>Cre/+</sup> mice

323 heterozygous for *Prdm12*<sup>-/+</sup> to the *Prdm12*<sup>FF</sup> mice, and to a CRE-dependent fluorescent reporter (*R26*<sup>LSL-</sup>  
324 *tdTomato*, Ai14) (Madisen et al., 2010). The resulting *Prdm12*<sup>AviCKO</sup> mice survive, in contrast to the neonatal  
325 lethality seen with germline KO. *Prdm12*<sup>AviCKO</sup> were therefore tested to see whether loss of *Prdm12*  
326 specifically in DRGs causes deficits in pain sensation.

327 To investigate the phenotypic consequence of sensory neuron-specific *Prdm12*-knockout, we  
328 tested the sensation of *Prdm12*<sup>AviCKO</sup> mice to a variety of stimuli. Notably, mechanical nociception was  
329 reduced in mutant mice in both pinprick and tail clip assays (Fig. 3A-B). Nociceptive cold sensitivity to a  
330 0-5°C cold plate was similarly reduced, reflecting that cold thermal-sensing nociceptors are affected as  
331 well (Fig. 3C). Curiously, while human *Prdm12*-associated CIP also causes heat insensitivity, thermal  
332 thresholds were unchanged using both the Hargreaves assay and hot plate at various temperatures (Fig.  
333 3D-E), indicating that *Prdm12*<sup>AviCKO</sup> mice remain sensitive to nociceptive heat stimuli. As with cases of  
334 human CIP, non-nociceptive sensation remained intact (Chen et al., 2015). Responses of *Prdm12*<sup>AviCKO</sup>  
335 mice to low-threshold mechanical stimuli applied with von Frey hairs were similar to control, as were  
336 responses to dynamic stimuli applied with a brush stroke (Fig. 3F-G). Control and mutant mice also had  
337 a similar latency to response to a piece of tape applied to the plantar surface of the hindpaw, again  
338 reflecting normal tactile sensation (Fig. 3H). Finally, pruriception was tested by intradermal injection of  
339 either chloroquine or histamine into the nape of the neck. *Prdm12*<sup>AviCKO</sup> mice showed a significantly  
340 reduced scratch response to both stimuli, indicating that loss of *Prdm12* during development impacts itch  
341 sensation as well as nociception (Fig. 3I-J).

#### 342 *Developmental loss of Prdm12 reduces the number of nociceptors in the DRG*

343 Having revealed a behavioral phenotype resulting from loss of *Prdm12*, we next assessed what  
344 molecular changes occurred in *Prdm12*<sup>AviCKO</sup> DRGs. To confirm that our genetic manipulation was  
345 successful, we performed RNAscope using a probe specifically targeting exon V of *Prdm12*. As expected,  
346 the probe detected mRNA transcript as multiple distinct puncta in control tissue, but not in mutant DRGs,  
347 indicating successful knockout of this region (Fig. 4I).

348 On further histological assessment, DRGs from *Prdm12*<sup>AviCKO</sup> mice were found to be missing the  
349 majority of their nociceptive neurons. The population of non-peptidergic IB4<sup>+</sup> C-fibers was reduced by

350 ~80% in mutant DRG sections (Fig. 4A-B). The number of peptidergic CGRP<sup>+</sup> neurons was similarly  
351 reduced by ~50% (Fig. 4C). Unlike in the constitutive knockout (*Prdm12*<sup>-/-</sup>), *Prdm12*<sup>AviCKO</sup> mice still have  
352 TRKA<sup>+</sup> neurons, though this population was reduced by ~75% (Fig. 4D-E). With such a drastic loss of  
353 unmyelinated C-fibers, we expected the majority of cells remaining in the DRG to be myelinated.  
354 However, we found a wide variation in the percentage of NF200<sup>+</sup> cells (18%-85%), with some mutant  
355 DRGs showing no change in the relative number of NF200<sup>+</sup> cells (Fig. 4F). Finally, even though we saw  
356 no difference in heat sensitivity, TRPV1 was reduced by ~70% (Fig. 4G-H). This raises the possibility that  
357 functional compensation in nociceptors expressing TRPM3 or TRPA1 remains unaffected by *Prdm12*-  
358 knockout, as these ion channels were shown to have an overlapping role in heat sensation with TRPV1  
359 (Vandewauw et al., 2018). Furthermore, the retention of heat thermal nociception may be explained by  
360 timing of the knockout, which does not occur until E12.5 in mutant mice. Because *Prdm12* is expressed  
361 as early as E9.5, it is possible that the delay in knockout spares some populations of nociceptors (Chen  
362 et al., 2015; Kinameri et al., 2008; Sharma et al., 2020).

#### 363 *Adult knockout of Prdm12 does not affect nociception in naïve or injured animals*

364 While our results so far add to the field of knowledge regarding the role of *Prdm12* during  
365 nociceptor development, very little is known yet about the function of this transcription factor in adulthood.  
366 *Prdm12* continues to be expressed in nociceptors of mature DRGs (Fig. 4I) and through late adulthood  
367 (Chen et al., 2015; Kinameri et al., 2008; Sharma et al., 2020; Usoskin et al., 2014). We set out to  
368 investigate the adult role of *Prdm12* by crossing *Prdm12*<sup>F/F</sup> mice with the *Avi*<sup>CreERT2</sup>BAC transgenic strain  
369 heterozygous for *Prdm12*<sup>+/-</sup> (Lau et al., 2011) to generate *Prdm12*<sup>AviERT2CKO</sup> mice. The *Cre*<sup>ERT2</sup> allows for  
370 temporal control of recombination, as it only becomes nuclear localized with exposure to tamoxifen.

371 To test whether loss of *Prdm12* from mature nociceptors affects pain sensation, *Prdm12*<sup>AviERT2CKO</sup>  
372 mice and control littermates were injected with tamoxifen at 8 weeks of age to delete *Prdm12* from  
373 sensory neurons (Fig. 5A). After four weeks, baseline nociceptive responses to von Frey, cold plantar  
374 assay (CPA), and Hargreaves were used to assess mechanical, cold, and heat nociception, respectively.  
375 No differences in responses were found between control and mutant mice with any of these assays (Fig.

376 5, “BL”). Similarly, no difference was found in the licking response to capsaicin injected into the hindpaw,  
377 suggesting TRPV1<sup>+</sup> nociceptors were functioning normally (Fig. 5B).

378 Although we found no changes in nociception in *Prdm12*<sup>AvilERT2CKO</sup> mice, PRDM12 has been  
379 implicated in chromatin remodeling complexes with EHMT2 (Yang and Shinkai, 2013). EHMT2 has been  
380 found to mediate mechanical allodynia and heat hyperalgesia upon nerve injury through repression of  
381 voltage-gated potassium channels (Laumet et al., 2015; Liang et al., 2016). Therefore, we hypothesized  
382 that PRDM12 may also play a role in sensitization following injury through its interactions with EHMT2.  
383 We assessed the effect on allodynia and hyperalgesia in *Prdm12*<sup>AvilERT2CKO</sup> mice in the setting of both  
384 nerve and inflammatory injury.

385 Spared nerve injury was performed on *Prdm12*<sup>AvilERT2CKO</sup> mice and littermate controls 4 weeks  
386 after tamoxifen injection, and nociceptive behavior was reassessed. Von Frey testing was performed at  
387 several timepoints to establish a time course of responses. Surprisingly, no reduction in mechanical  
388 allodynia was found, as both control and *Prdm12*<sup>AvilERT2CKO</sup> mice became hypersensitive following SNI,  
389 with no difference in paw withdrawal thresholds between the groups at any time point (Fig. 5C). Neither  
390 controls nor mutants developed cold allodynia following SNI, as measured with the cold plantar assay.  
391 This is likely because the posture adopted by injured mice lifts the hypersensitized region away from the  
392 glass, preventing direct application of the cold stimulus. In fact, controls showed a slight increase in  
393 latency to response (Fig. 5D). Both groups of mice experienced similar degrees of heat hyperalgesia  
394 measured by Hargreaves, but again no difference emerged between controls and mutants (Fig. 5E).  
395 These findings indicate that *Prdm12* does not affect hypersensitivity of mature nociceptors following  
396 nerve injury.

397 We next wanted to determine whether loss of *Prdm12* would confer protection following  
398 inflammatory injury. To test this, we injected CFA into the hindpaw of control and mutant mice, and  
399 measured the responses to mechanical and thermal stimuli over the next three weeks (Fig. 5F-H). Again,  
400 no differences in responses were noted between controls and mutants. Both groups developed similar  
401 levels of tactile allodynia, which faded approximately three weeks after injection (Fig. 5F-G). As an  
402 additional measure, we also tested sensitivity to pinch in the inflamed paw 3 days after CFA injection,

403 and found no difference between cohorts (Fig. 5F). Similarly, no differences in thermal hyperalgesia were  
404 noted between the two groups (Fig. 5H). Overall, our results show that loss of *Prdm12* function during  
405 adulthood does not alter pain sensation or affect the development of allodynia and hyperalgesia following  
406 injury.

#### 407 *Molecular and transcriptional changes following Prdm12-knockout in adult*

408 To look for molecular changes that may illuminate the observed lack of phenotype, we next used  
409 immunohistochemistry to assess for any changes in the DRG. Lumbar DRGs were taken from control  
410 and *Prdm12*<sup>AvilERT2CKO</sup> mice 4 weeks post-SNI, so that we could investigate changes following both  
411 tamoxifen injection and neuropathic injury. We first verified successful knockout of *Prdm12* using the  
412 exon V-specific RNAscope probe, and found it be absent from *Prdm12*<sup>AvilERT2CKO</sup> DRG neurons (Fig. 6A).  
413 Assessment of nociceptor populations within the DRG, however, found no significant differences in levels  
414 of IB4, CGRP, TRKA, NF200, or TRPV1 between groups (Fig. 6B-G). Additionally, no significant changes  
415 in these markers were noted between DRGs ipsilateral and contralateral to SNI, suggesting that nerve  
416 injury also does not alter the numbers of these nociceptor populations (Fig. 6B-G), consistent with the  
417 subtle transcriptional changes of these markers upon injury (Renthal et al., 2020).

418 To investigate broader transcriptional changes that occur following loss of *Prdm12*, we performed  
419 bulk mRNA-seq of DRGs harvested from *Prdm12*<sup>AvilERT2CKO</sup> and control mice two weeks after tamoxifen  
420 injection. SNI was not performed on these animals. As expected, exon V is specifically knocked out in  
421 *Prdm12*<sup>AvilERT2CKO</sup> mice (Fig. 7A). Surprisingly, though, we found that the majority of the differentially  
422 expressed genes (DEGs) were decreased in knockout mice, suggesting PRDM12 acts as a  
423 transcriptional activator (Fig. 7B). This is in contrast to prior evidence suggesting that histone  
424 methyltransferase activity associated with *Prdm12* is repressive (Kinameri et al., 2008; Thelie et al.,  
425 2015).

426 Because mRNA was harvested from all cells in the DRG, we cross-referenced the initial list of  
427 150 DEGs to a published data set from scRNA-seq of DRG neurons (Sharma et al., 2020) (Fig. 7B,  
428 Supplemental Table 1). 44 of these genes were nociceptor-specific—43 were decreased after loss of  
429 *Prdm12*, and only 1 gene, *Chrna6*, was increased (Fig. 7B). Most of the nociceptive genes identified in  
16



430 our data set are not classically used to define nociceptor cell types. One exception is *Trpm3*, which has  
431 been shown to mediate nociceptive heat sensation. Notably, two other ion channels involved in  
432 nociceptive heat sensation, *Trpv1* and *Trpa1*, were not changed in our dataset (Vandewauw et al., 2018).  
433 Overall, despite the lack of overt differences in pain sensation in *Prdm12*<sup>AvilERT2CKO</sup> mice, it appears that  
434 loss of function of *Prdm12* does have a role in transcriptional control of adult nociceptors, but the exact  
435 nature of that role requires further investigation.

436

## 437 **Discussion**

438 In this study, we explore the role of *Prdm12* both during embryonic development and in the adult.  
439 We find that while it is necessary for nociceptor neurogenesis, its function in mature nociceptors is  
440 unclear. We find that constitutive deletion of *Prdm12* exon V precludes development of the entire  
441 nociceptor lineage, normally marked by TRKA expression, resulting in smaller DRGs with fewer  
442 differentiated neurons. Moreover, our findings suggest that this is in part due to reduced precursor  
443 proliferation. Furthermore, we show that in a conditional knockout model, mice have reduced sensitivity  
444 to certain modalities of pain and itch, with correspondingly reduced nociceptor populations in the DRGs,  
445 but curiously heat sensation is spared. Lastly, we provide evidence that the function of *Prdm12* differs in  
446 adult DRGs compared to neurogenesis, as knockout did not significantly alter pain phenotype or  
447 nociceptor populations even in the context of injury and inflammation.

### 448 *Prdm12 is required for nociceptor development*

449 We find that constitutive deletion of *Prdm12* exon V is sufficient to impede nociceptor  
450 development. As with prior reports using an exon II-knockout, we find that expression of TRKA is  
451 completely absent from DRGs of *Prdm12*<sup>-/-</sup> embryos at all embryonic time points, supporting a key role  
452 in specification of this lineage (Bartesaghi et al., 2019; Desiderio et al., 2019). Our findings indicate that  
453 nociceptors fail to develop in *Prdm12*<sup>-/-</sup> mice likely due to defects in specification and/or proliferation of  
454 progenitors that are likely to become nociceptors, and not due to an increase in cell death or  
455 respecification to proprioceptors, consistent with findings by Bartesaghi et al.

### 456 *Conditional knockout of Prdm12 from sensory neurons recapitulates aspects of human CIP*

457 Here we show that *Prdm12*<sup>AvilCKO</sup> mice bred to selectively remove *Prdm12* from DRGs during  
458 neurogenesis have deficiencies in several sensory modalities. Specifically, they have reduced mechano-  
459 nociception and cold nociception, as well as pruriception, all of which are hallmarks of CIP (Indo, 2014).  
460 These behavioral differences were accompanied by losses of IB4<sup>+</sup>, CGRP<sup>+</sup>, TRKA<sup>+</sup>, and TRPV1<sup>+</sup>  
461 nociceptors from the DRGs. These changes bear a striking resemblance to the phenotype observed  
462 following ablation of Na<sub>v</sub>1.8<sup>+</sup> postmitotic sensory neurons (Abrahamsen et al., 2008). These mice also  
463 show reduced IB4<sup>+</sup> and CGRP<sup>+</sup> nociceptor populations, as well as reduced TRKA and TRPV1 expression,  
464 and defects in cold and mechanical nociception, but not heat. These similarities raise the possibility that  
465 knockout of *Prdm12* in our model had a greater impact on Na<sub>v</sub>1.8<sup>+</sup> neurons than the nociceptor population  
466 as a whole, leading to residual pain sensation. Interestingly, though, both Na<sub>v</sub>1.8-expressing nociceptor-  
467 ablated mice and *Trpv1*<sup>-/-</sup> mice, which also have no heat phenotype at baseline, show reduced heat  
468 hyperalgesia following inflammatory injury (Abrahamsen et al., 2008; Davis et al., 2000), a phenotype not  
469 assessed in the *Prdm12*<sup>AvilCKO</sup> mice.

470 *Residual pain in Prdm12*<sup>AvilCKO</sup> and *Prdm12*<sup>AvilERT2CKO</sup> mice may indicate autonomous PR domain function

471 Comparing and contrasting the phenotype between the *Prdm12* exon II (Bartesaghi et al., 2019;  
472 Desiderio et al., 2019) and exon V (shown here) knockout mouse models can give us some clues as to  
473 the function of different domains within the PRDM12 protein. In the exon II knockout, exons II-V, which  
474 code for all functional domains for PRDM12 including the PR domain, are deleted (Bartesaghi et al.,  
475 2019; Desiderio et al., 2019). In the exon V knockout, the coding sequence for the three zinc finger  
476 domains, polyalanine repeat, and a nuclear localization sequence, are deleted. We found in our adult  
477 *Prdm12*<sup>AvilERT2CKO</sup> mice that transcripts for exons I-IV, which includes the PR domain, are still expressed  
478 albeit at reduced levels (~35%) (Fig. 7A). Therefore, while the putative interaction with EHMT2 that occurs  
479 through ZnF2 is disrupted in both the exon II and exon V knockout mouse models (Yang and Shinkai,  
480 2013), the PR domain is potentially still expressed in the *Prdm12* exon V mouse model.

481 At the phenotypic level, subtle differences are seen in the *Prdm12* exon II and exon V sensory  
482 neuron-specific conditional knockout mice. In the knockout of *Prdm12* exon II, also using the *Avil*<sup>Cre/+</sup>  
483 strain, mice were observed to develop eye opacities, as well as tail and facial scratches and wounds,

484 similar to clouding of the eye and self-mutilating injuries seen in human CIP patients (Chen et al., 2015;  
485 Desiderio et al., 2019), but no such phenotype was noted in the *Prdm12*<sup>AviCKO</sup> mice presented here. It is  
486 possible that the PR domain is translated in the *Prdm12*<sup>AviCKO</sup> mice, carrying out an as-yet undescribed  
487 function independent of EHMT2, leading to a less severe phenotype than that seen with the sensory-  
488 specific conditional knockout of *Prdm12* exon II (Desiderio et al., 2019). Strain differences could also be  
489 another variable since our model was on a mixed background, while the exon II KO was in C57Bl/6J  
490 mice. Furthermore, the retention of exons I-IV in the adult *Prdm12*<sup>AviERT2CKO</sup> mice might contribute to the  
491 lack of detectable nociceptive phenotype in the adult. Further studies directly comparing the nociceptive  
492 behaviors in the exon II and exon V conditional KO mice will lend further insight into the potential role of  
493 the PR domain.

494 *Prdm12 may function as both an activator and a repressor, with distinct functions in adult nociceptors*

495 As a whole, the PRDM family of transcription factors can have multifaceted roles including being  
496 an activator of cellular lineages and repressor of alternative fates, even within the same cell (Hohenauer  
497 and Moore, 2012). Early evidence suggested PRDM12 functions primarily as a repressor, due to its  
498 interactions with EHMT2, and its role in repressing neighboring progenitor domains of the V1 progenitor  
499 population in the developing spinal cord (Fog et al., 2012; Kinameri et al., 2008; Thelie et al., 2015).  
500 However, the RNA-sequencing data we report here points to PRDM12 serving as a transcriptional  
501 activator in the adult context, given that almost every transcript identified was downregulated in  
502 *Prdm12*<sup>AviERT2CKO</sup> mice. While it is possible that PRDM12 could be repressing a repressor, we are unable  
503 to identify a repressor that is upregulated following *Prdm12*-knockout. Furthermore, overexpression of  
504 PRDM12 with NEUROG1 in *Xenopus laevis* explants induces expression of several other genes essential  
505 for sensory neurogenesis, such as TRKA, while germline knockout in mice resulted in both increases and  
506 decreases of downstream targets during development (Desiderio et al., 2019; Nagy et al., 2015).  
507 Evidence thus suggests that PRDM12 may act as either a repressor or activator, and that this activity  
508 may change over developmental time, with PRDM12 being an activator in the adult mouse.

509 It is also notable that with the exception of *Prdm12* itself, there was almost no overlap in DEGs  
510 identified in our work and by Desiderio et al. Developmentally, *Prdm12* regulates an array of genes

511 involved in generation of spinal cord interneurons, as well as transcriptional regulators of sensory neuron  
512 differentiation (Desiderio et al., 2019). DEGs identified in our data set are not obviously related to  
513 nociceptor neurogenesis, nor are they generally used to define nociceptor cell types, however some are  
514 nociceptor-specific (Sharma et al., 2020). Given that PRDM12 is proposed to induce *Ntrk1* expression  
515 through interactions with NEUROG1, which is only present during DRG embryogenesis, the lack of  
516 overlap between datasets is not surprising, but again points to alternate roles of *Prdm12* during  
517 development and in adult DRGs.

518         Indeed, the role of *Prdm12* in adult DRGs remains elusive. We found that exon V deletion in 8-  
519 week-old *Prdm12*<sup>AvilERT2CKO</sup> mice did not affect a nociceptive phenotype under baseline, inflammatory, or  
520 neuropathic conditions. This was surprising for two reasons. Firstly, as already described, PRDM12 is  
521 thought to interact with EHMT2. The latter methyltransferase is normally upregulated after nerve injury,  
522 and developmental knockout or inhibition of EHMT2 reduces tactile allodynia and thermal hypersensitivity  
523 after neuropathic injury (Laumet et al., 2015; Liang et al., 2016). We hypothesized that PRDM12 would  
524 play a role in sensitization following nerve injury through its interactions with EHMT2, but this was refuted  
525 by the lack of a difference in sensitivity in *Prdm12*<sup>AvilERT2CKO</sup> mice following SNI. As EHMT2 and PRDM12  
526 proteins interact via ZnF2, which is deleted in our model, our data suggests that PRDM12 does not play  
527 a role in EHMT2-dependent hypersensitivity. Second, overexpression of *Chrna6*, which encodes the  $\alpha 6$   
528 subunit of the nicotinic acetylcholine receptor (nAChR), is protective against tactile allodynia in both  
529 neuropathic and inflammatory injury models (Wieskopf et al., 2015). *Chrna6* was also the only gene found  
530 to be upregulated in *Prdm12*<sup>AvilERT2CKO</sup> mice, about two-fold over control levels. Given the absence of a  
531 phenotype in our mice, it is possible that a further increase in expression level is required to achieve  
532 protection against allodynia.

533         It is clear that *Prdm12* plays an integral role in the development of sensory neurons, and further  
534 study is needed to clarify the precise mechanisms requiring PRDM12 that specify the nociceptive lineage.  
535 Beyond development, however, *Prdm12* remains a specific marker of nociceptive neurons. While our  
536 study demonstrates that direct inhibition of its activity may not provide analgesic relief, we do find  
537 transcriptional changes resulting from its loss, and contend that further study is needed to define the

538 precise nature of these changes, and whether they present a different angle for development of novel  
539 analgesics.

540

## 541 **Acknowledgements**

542 This work was supported by F31 NS111796 and the William F. and Grace H. Kirkpatrick Award  
543 to M.A.L., NIH R01 DK114036 to C.L., Rita Allen Foundation Award in Pain, Welch Foundation,  
544 President's Research Council Award, and Kent Waldrep Foundation to H.C.L. We thank Thomas  
545 Jessell for the RUNX3 antibody, Tou Yia Vue for help with EdU staining, Fan Wang for the *Advillin*<sup>Cre/+</sup>  
546 mice, the UTSW Microarray Core Facility, UTSW Transgenic Core Facility, Stephanie Shiers, Rahul K.  
547 Kollipara, and the Johnson lab for technical assistance, Saida Hadjab for helpful discussions, Ted Price  
548 and Jane Johnson for critical reading of the manuscript.

## 549 **Author Contributions**

550 H.C.L. designed and supervised the study. M.A.L. performed most experiments; M.G. and K.M.C.  
551 assisted with immunostaining experiments and microscopy analysis. C.L. generated and provided the  
552 *Prdm12*<sup>F/F</sup> mice prior to publication. M.A.L. and M.G. prepared the figures. M.A.L. and H.C.L. wrote the  
553 paper with input from all other authors.

## 554 **Declaration of Interests**

555 The authors declare no competing interests.

## 556 **Legends**

557 **Figure 1. DRGs from *Prdm12*<sup>-/-</sup> embryos are smaller and lack nociceptors.** (A) PRDM12 protein  
558 domain structure with corresponding exons. \*Human disease-causing mutations. (B) Schematic of the  
559 *Prdm12*<sup>F/F</sup> allele. (C) *In situ* hybridization with an exon V-specific probe verified deletion of this transcript  
560 in *Prdm12*<sup>-/-</sup> embryos. Scale bar 50  $\mu$ m. (D) Quantification of DRG area from immunofluorescence images  
561 reveals *Prdm12*<sup>-/-</sup> DRGs are smaller at all timepoints (E11.5  $p = 0.017$ , E12.5  $p = 0.003$ , E13.5  $p = 0.023$ ,  
562 E18.5  $p = 0.003$ ). (E) Representative images of ISL1 immunohistochemistry, with inset shown on right.  
563 Scale bars 50  $\mu$ m. (F) Quantification reveals a similar number of ISL1<sup>+</sup> cells at E11.5 and E12.5 in control  
564 and KO tissue, but a significant reduction in counts at E13.5 ( $p = 0.012$ ) and E18.5 ( $p = 0.0005$ ) in KO

565 embryos. (G) Representative images of TRKA immunohistochemistry, with inset shown on right. Scale  
566 bars 50  $\mu\text{m}$ . (H) Quantification reveals a complete absence of TRKA<sup>+</sup> precursors in *Prdm12*<sup>-/-</sup> embryos at  
567 all time points (E11.5  $p = 0.001$ , E12.5 and E13.5  $p < 0.0001$ , E18.5  $p = 0.0004$ ). (I) Representative  
568 images of RUNX3 immunohistochemistry, with inset shown on right. Scale bars 50  $\mu\text{m}$ . (H) Quantification  
569 reveals no significant difference between control and KO DRGs at any timepoint. For all graphs, a data  
570 point represents the average across 3 DRGs taken from the lumbar region of a single embryo. Results  
571 are presented as mean  $\pm$  SEM; statistical analysis performed with pairwise *t*-tests.

572 **Figure 2. Defects in proliferation but not cell death in *Prdm12*<sup>-/-</sup> mice.** (A) Representative images of  
573 cleaved caspase-3 immunohistochemistry in E12.5 embryos. Scale bar 50  $\mu\text{m}$ . (B) Quantification reveals  
574 a small but significant reduction of CASP3<sup>+</sup> cells in *Prdm12*<sup>-/-</sup> embryos at E12.5 ( $p = 0.043$ ). (C) When  
575 normalized to DRG area, there is no significant difference in the number of CASP<sup>+</sup> cells at any time point.  
576 (D) Representative images of DRGs labeled with EdU just prior to collection at E11.5. (E) Quantification  
577 reveals a significant reduction in EdU-labeled cells at E11.5 ( $p = 0.003$ ) in *Prdm12*<sup>-/-</sup> DRGs. (F) When  
578 corrected for DRG size, counts indicate increased relative EdU labeling in *Prdm12*<sup>-/-</sup> DRGs at E12.5 ( $p =$   
579 0.009) and E13.5 ( $p = 0.021$ ). For all graphs, a data point represents the average across 3 DRGs taken  
580 from the lumbar region of a single embryo. Results are presented as mean  $\pm$  SEM; statistical analysis  
581 performed with pairwise *t*-tests.

582 **Figure 3. *Prdm12*<sup>AvilCKO</sup> mice have reduced sensation to mechanical and cold nociceptive stimuli,**  
583 **and chemical pruritogens.** (A-I) Panels show behavioral responses of *Prdm12*<sup>AvilCKO</sup> mice ( $n = 14$ ) and  
584 control littermates ( $n = 18$ ); each group is split 50/50 M:F. (A) *Prdm12*<sup>AvilCKO</sup> mice show reduced sensitivity  
585 to a sharp pin,  $p < 0.0001$ . (B, C) *Prdm12*<sup>AvilCKO</sup> mice show a delayed response to a clip attached to the  
586 tail (B,  $p = 0.002$ ) and when placed on a cold plate (C, 0-5°C,  $p = 0.033$ ). (D, E) *Prdm12*<sup>AvilCKO</sup> mice  
587 showed no differences in response to heat stimuli in the Hargreaves (D) or hot plate (E) assays. (F-H)  
588 Light touch is also normal in *Prdm12*<sup>AvilCKO</sup> mice, which show similar withdrawal thresholds to von Frey  
589 hairs (F,  $p = 0.115$ ), responses to dynamic light touch (G), and latency to removal of a piece of tape  
590 applied to the plantar surface of the hindpaw (H). (I) *Prdm12*<sup>AvilCKO</sup> mice show reduced scratch time  
591 following intradermal chloroquine injection in the nape of the neck,  $p < 0.0001$ . (J) Scratch time is similarly

592 reduced in *Prdm12*<sup>AviCKO</sup> mice (n = 5) compared to control littermates (n = 14) following intradermal  
593 histamine injection in the nape of the neck,  $p = 0.029$ . All behavioral data analyzed by *t*-test; results are  
594 presented as mean  $\pm$  SEM.

595 **Figure 4. Nociceptor populations are reduced in *Prdm12*<sup>AviCKO</sup> mice.** (A) Representative image  
596 showing number of IB4<sup>+</sup> (arrows) and CGRP<sup>+</sup> (arrowheads) nociceptors are reduced in *Prdm12*<sup>AviCKO</sup>  
597 DRGs. Scale bar 100  $\mu$ m. (B, C) Quantification of IB4<sup>+</sup> (B,  $p < 0.0001$ ) and CGRP<sup>+</sup> (C,  $p = 0.027$ )  
598 nociceptors as a percent of the total Tom<sup>+</sup> population of sensory neurons. (D) Representative image of  
599 TRKA<sup>+</sup> nociceptors and NF200<sup>+</sup> myelinated neurons in *Prdm12*<sup>AviCKO</sup> and control mice. Scale bar 100  $\mu$ m.  
600 (E) Quantification showing significant reduction of TRKA<sup>+</sup> nociceptors,  $p = 0.0135$ . (F) Quantification of  
601 NF200<sup>+</sup> neurons showing a wide range in *Prdm12*<sup>AviCKO</sup> mice, but no significant change from control  
602 littermates,  $p = 0.278$ . (G, H) Representative image (G) and quantification (H) of the reduction in number  
603 and intensity of TRPV1<sup>+</sup> nociceptors,  $p = 0.0025$ . Scale bar 100  $\mu$ m. (I) RNAscope using exon V-specific  
604 probes confirmed knockout of *Prdm12* from mutant DRGs. All analysis was completed using DRGs from  
605 lumbar levels 2 through 5; each data point represents the average count across 3 DRGs from control (n  
606 = 3) or *Prdm12*<sup>AviCKO</sup> (n = 4) mice taken after behavior analysis around 10 weeks of age. Scale bar 50  
607  $\mu$ m. All quantification analyzed by *t*-test; results are presented as mean  $\pm$  SEM.

608 **Figure 5. Knockout of *Prdm12* in adulthood does not reduce pain sensitivity in naïve or injured**  
609 **mice.** (A) Schematic showing experimental timeline. (B) No difference was observed in the time spent  
610 licking after capsaicin injection into the hindpaw between *Prdm12*<sup>AviERT2CKO</sup> (n = 7, 3:4 M:F) and control  
611 (N=19, 11:8 M:F) mice. (C-E) Behavioral results before and after SNI. (C) Time course of withdrawal  
612 thresholds for *Prdm12*<sup>AviERT2CKO</sup> (n = 12, 5:7 M:F) and control (n = 18, 8:10 M:F) mice showing both groups  
613 developed mechanical allodynia following SNI. (D) Responses of *Prdm12*<sup>AviERT2CKO</sup> mice (n = 9, 5:4 M:F)  
614 to cold plantar assay did not differ significantly from control (n = 15, 7:8 M:F) at baseline or 4 weeks post-  
615 SNI. Control mice did show a slight increase in latency to response following SNI,  $p = 0.038$ . (E) Both  
616 groups experienced heat hyperalgesia four weeks post-SNI, but did not differ from each other at either  
617 time point. Same n as (C), control  $p = 0.004$ , *Prdm12*<sup>AviERT2CKO</sup>  $p = 0.0009$ . (F-H) Behavioral results  
618 following CFA injection. (F) No difference was observed in the withdrawal threshold to paw pinch between

619 *Prdm12*<sup>AvilERT2CKO</sup> (n = 6, 3:3 M:F) and control (n = 21, 12:9 M:F), which was tested 3 days after CFA  
620 injection. Note that withdrawal thresholds are several-fold higher due to the larger area over which  
621 pressure is applied with the rodent pincher compared to von Frey filaments. (G) Time course of  
622 withdrawal thresholds showing both groups developed tactile allodynia following CFA, and recovered  
623 over the same time period. Same n as (F). (H) Both groups developed heat hyperalgesia following CFA  
624 injection. Same n as (F). Statistical analysis by 2-way ANOVA for (C), (G), (H); pairwise t-tests for other  
625 data sets.

626 **Figure 6. DRG nociceptor populations are unchanged following *Prdm12* knockout and/or SNI.** (A)  
627 Exon V-specific RNAscope verified loss of mRNA transcript in *Prdm12*<sup>AvilERT2CKO</sup> mice. Scale bar 100  $\mu$ m.  
628 Inset arrows indicate mRNA puncta detected by the probe; inset scale bar 25  $\mu$ m. (B) Representative  
629 images of lumbar DRGs from control and *Prdm12*<sup>AvilERT2CKO</sup> DRGs contralateral to and ipsilateral to SNI  
630 with immunohistochemistry for IB4 and CGRP. Scale bar 100  $\mu$ m. (C-G) Quantification of these images  
631 revealed no changes in the number of IB4<sup>+</sup> (C), CGRP<sup>+</sup> (D), NF200<sup>+</sup> (E), TRKA<sup>+</sup> (F), or TRPV1<sup>+</sup> (G)  
632 neurons after SNI in either control or *Prdm12*<sup>AvilERT2CKO</sup> mice, or between these two groups at either time  
633 point. Each data point represents the average count across 3 DRGs taken from the L2-L5 region of n =  
634 2 control mice post-SNI, or n = 3 mice for all other conditions. DRGs were collected after behavior  
635 assessment, at 18 weeks. Graphs show mean  $\pm$  SEM; statistical analysis with pairwise t-tests.

636 **Figure 7. Transcriptional changes in *Prdm12*<sup>AvilERT2CKO</sup> mice.** (A) Sequencing reads from two control  
637 (ctrl-1 and 2) and two mutant (mut-1 and 2) samples show that exon V is specifically knocked out (arrows).  
638 (B) 43 genes expressed in nociceptors are decreased in the mutant (negative log<sub>2</sub> (Fold Change)), and  
639 1 gene is increased (*Chrna6*). FPKM values are averaged across both samples.

640 **Supplemental Figure 1. Characterization of a sensory neuron specific CRE line.** (See Fig. 3).  
641 *Avil*<sup>Cre/+</sup> crossed to a CRE-dependent reporter identifies DRG neurons expressing CRE recombinase. (A-  
642 C) *Avil*<sup>Cre/+</sup>-lineage neurons colocalize with myelinated DRG neurons (A, NF200<sup>+</sup>, arrows) unmyelinated  
643 TRPV1<sup>+</sup> neurons (B, arrows), and nonpeptidergic (C, IB4<sup>+</sup>, arrows) and peptidergic (C, CGRP<sup>+</sup>,  
644 arrowheads) C-fibers. (D) The *Avil*<sup>Cre/+</sup>-lineage also colocalizes with *Prdm12* mRNA expression (arrows,  
645 RNAscope). Scale bars 100  $\mu$ m.



646

647 **References:**

- 648 Abrahamsen, B., Zhao, J., Asante, C.O., Cendan, C.M., Marsh, S., Martinez-Barbera, J.P., Nassar,  
649 M.A., Dickenson, A.H., and Wood, J.N. (2008). The Cell and Molecular Basis of Mechanical, Cold,  
650 and Inflammatory Pain. *Science* (80-. ). *321*, 702–705.
- 651 Bartesaghi, L., Wang, Y., Fontanet, P., Wanderoy, S., Berger, F., Wu, H., Akkuratova, N., Bouçanova,  
652 F., Médard, J.-J.J., Petitpré, C., et al. (2019). PRDM12 Is Required for Initiation of the Nociceptive  
653 Neuron Lineage during Neurogenesis. *Cell Rep.* *26*, 3484-3492.e4.
- 654 Bonin, R.P., Bories, C., and Koninck, Y. De (2014). MOLECULAR PAIN A simplified up-down method  
655 ( SUDO ) for measuring mechanical nociception in rodents using von Frey filaments A simplified up-  
656 down method ( SUDO ) for measuring mechanical nociception in rodents using von Frey filaments.  
657 *Mol. Pain* *10*, 1–10.
- 658 Brenner, D.S., Golden, J.P., and Gereau, R.W. (2012). A Novel Behavioral Assay for Measuring Cold  
659 Sensation in Mice. *7*.
- 660 Capsoni, S., Covaceuszach, S., Marinelli, S., Ceci, M., Bernardo, A., Minghetti, L., Ugolini, G., Pavone,  
661 F., and Cattaneo, A. (2011). Taking pain out of ngf: A “painless” ngf mutant, linked to hereditary  
662 sensory autonomic neuropathy type v, with full neurotrophic activity. *PLoS One* *6*.
- 663 Carvalho, O.P., Thornton, G.K., Hertecant, J., Houlden, H., Nicholas, A.K., Cox, J.J., Rielly, M., Al-  
664 Gazali, L., and Woods, C.G. (2011). A novel NGF mutation clarifies the molecular mechanism and  
665 extends the phenotypic spectrum of the HSN5 neuropathy. *J. Med. Genet.* *48*, 131–135.
- 666 Chen, X., Wyler, S.C., Li, L., Arnold, A.G., Wan, R., Jia, L., Landy, M.A., Lai, H.C., Xu, P., and Liu, C.  
667 (2020). Comparative Transcriptomic Analyses of Developing Melanocortin Neurons Reveal New  
668 Regulators for the Anorexigenic Neuron Identity. *40*, 3165–3177.
- 669 Chen, Y.C., Auer-Grumbach, M., Matsukawa, S., Zitzelsberger, M., Themistocleous, A.C., Strom, T.M.,  
670 Samara, C., Moore, A.W., Cho, L.T., Young, G.T., et al. (2015). Transcriptional regulator PRDM12  
671 is essential for human pain perception. *Nat. Genet.* *47*, 803–808.
- 672 Cox, J.J., Reimann, F., Nicholas, A.K., Thornton, G., Roberts, E., Springell, K., Karbani, G., Jafri, H.,  
25

- 673 Mannan, J., Raashid, Y., et al. (2006). An SCN9A channelopathy causes congenital inability to  
674 experience pain. *Nature* **444**, 894–898.
- 675 Davis, J.B., Gray, J., Gunthorpe, M.J., Hatcher, J.P., Davey, P.T., Overend, P., Harries, M.H., Latcham,  
676 J., Clapham, C., Atkinson, K., et al. (2000). Vanilloid receptor-1 is essential for inflammatory  
677 thermal hyperalgesia. *Nature* **405**, 183–187.
- 678 Decosterd, I., and Woolf, C.J. (2000). Spared nerve injury: An animal model of persistent peripheral  
679 neuropathic pain. *Pain* **87**, 149–158.
- 680 Desiderio, S., Vermeiren, S., Van Campenhout, C., Kricha, S., Malki, E., Richts, S., Fletcher, E. V.,  
681 Vanwelden, T., Schmidt, B.Z., Henningfeld, K.A., et al. (2019). Prdm12 Directs Nociceptive Sensory  
682 Neuron Development by Regulating the Expression of the NGF Receptor TrkA. *Cell Rep.* **26**, 3522-  
683 3536.e5.
- 684 Einarsdottir, E., Carlsson, A., Minde, J., Toolanen, G., Svensson, O., Solders, G., Holmgren, G.,  
685 Holmberg, D., and Holmberg, M. (2004). A mutation in the nerve growth factor beta gene (NGFB)  
686 causes loss of pain perception. *Hum. Mol. Genet.* **13**, 799–805.
- 687 Fog, C.K., Galli, G.G., and Lund, A.H. (2012). PRDM proteins: Important players in differentiation and  
688 disease. *BioEssays* **34**, 50–60.
- 689 Hasegawa, H., Abbott, S., Han, B.-X., Qi, Y., and Wang, F. (2007). Analyzing somatosensory axon  
690 projections with the sensory neuron-specific Advillin gene. *J. Neurosci.* **27**, 14404–14414.
- 691 Hoffman, E.M., Zhang, Z., Anderson, M.B., Schechter, R., and Miller, K.E. (2011). Potential  
692 mechanisms for hypoalgesia induced by anti-nerve growth factor immunoglobulin are identified  
693 using autoimmune nerve growth factor deprivation. *Neuroscience* **193**, 452–465.
- 694 Hohenauer, T., and Moore, A.W. (2012). The Prdm family: expanding roles in stem cells and  
695 development. *Development* **139**, 2267–2282.
- 696 Hunter, D. V., Smaila, B.D., Lopes, D.M., Takatoh, J., Denk, F., and Ramer, M.S. (2018). Advillin Is  
697 Expressed in All Adult Neural Crest-Derived Neurons. *Eneuro* **5**, ENEURO.0077-18.2018.
- 698 Indo, Y. (2014). Expert Review of Neurotherapeutics Nerve growth factor , pain , itch and inflammation :  
699 lessons from congenital insensitivity to pain with anhidrosis. *Neurotherapeutics* **7**, 7175.

- 700 Inoue, K. ichi, Ozaki, S., Shiga, T., Ito, K., Masuda, T., Okado, N., Iseda, T., Kawaguchi, S., Ogawa, M.,  
701 Bae, S.C., et al. (2002). Runx3 controls the axonal projection of proprioceptive dorsal root ganglion  
702 neurons. *Nat. Neurosci.* 5, 946–954.
- 703 Kim, D., Pertea, G., Trapnell, C., Pimentel, H., Kelley, R., and Salzberg, S. (2013). TopHat2: accurate  
704 alignment of transcriptomes in the presence of insertions, deletions and gene fusions. *Genome Biol.*  
705 14.
- 706 Kinameri, E., Inoue, T., Aruga, J., Imayoshi, I., Kageyama, R., Shimogori, T., and Moore, A.W. (2008).  
707 Prdm proto-oncogene transcription factor family expression and interaction with the Notch-Hes  
708 pathway in mouse neurogenesis. *PLoS One* 3, 1–10.
- 709 Kitao, Y., Robertson, B., Kudo, M., and Grant, G. (2002). Proliferation patterns of dorsal root ganglion  
710 neurons of cutaneous, muscle and visceral nerves in the rat. *J. Neurocytol.* 31, 765–776.
- 711 Kramer, I., Sigrist, M., De Nooij, J.C., Taniuchi, I., Jessell, T.M., and Arber, S. (2006). A role for Runx  
712 transcription factor signaling in dorsal root ganglion sensory neuron diversification. *Neuron* 49, 379–  
713 393.
- 714 Kuraishi, Y., Nagasawa, T., Hayashi, K., and Satoh, M. (1995). Scratching behavior induced by  
715 pruritogenic but not algesiogenic agents in mice. *Eur. J. Pharmacol.* 275, 229–233.
- 716 Lallemand, F., and Ernfors, P. (2012). Molecular interactions underlying the specification of sensory  
717 neurons. *Trends Neurosci.* 35, 373–381.
- 718 Lau, J., Minett, M.S., Zhao, J., Dennehy, U., Wang, F., Wood, J.N., and Bogdanov, Y.D. (2011).  
719 Temporal control of gene deletion in sensory ganglia using a tamoxifen-inducible Advillin-Cre-ERT2  
720 recombinase mouse. *Mol. Pain* 7, 1–13.
- 721 Laumet, G., Garriga, J., Chen, S.R., Zhang, Y., Li, D.P., Smith, T.M., Dong, Y., Jelinek, J., Cesaroni,  
722 M., Issa, J.P., et al. (2015). G9a is essential for epigenetic silencing of K<sup>+</sup> channel genes in acute-  
723 to-chronic pain transition. *Nat. Neurosci.* 18, 1746–1755.
- 724 Lawson, S.N., and Biscoe, T.J. (1979). Development of mouse dorsal root ganglia: an autoradiographic  
725 and quantitative study. *J. Neurocytol.* 8, 265–274.
- 726 Leipold, E., Liebmann, L., Korenke, G.C., Heinrich, T., Gießelmann, S., Baets, J., Ebbinghaus, M.,  
27

- 727 Goral, R.O., Stödberg, T., Hennings, J.C., et al. (2013). A de novo gain-of-function mutation in  
728 SCN11A causes loss of pain perception. *Nat. Genet.* *45*, 1399–1407.
- 729 Levanon, D., Bettoun, D., Harris-Cerruti, C., Woolf, E., Negreanu, V., Eilam, R., Bernstein, Y.,  
730 Goldenberg, D., Xiao, C., Fliegau, M., et al. (2002). The Runx3 transcription factor regulates  
731 development and survival of TrkC dorsal root ganglia neurons. *EMBO J.* *21*, 3454–3463.
- 732 Liang, L., Gu, X., Zhao, J.Y., Wu, S., Miao, X., Xiao, J., Mo, K., Zhang, J., Lutz, B.M., Bekker, A., et al.  
733 (2016). G9a participates in nerve injury-induced Kcna2 downregulation in primary sensory neurons.  
734 *Sci. Rep.* *6*, 1–14.
- 735 Ma, Q., Fode, C., Guillemot, F., and Anderson, D.J. (1999). NEUROGENIN1 and NEUROGENIN2  
736 control two distinct waves of neurogenesis in developing dorsal root ganglia. *Genes Dev.* *13*, 1717–  
737 1728.
- 738 Madisen, L., Zwingman, T.A., Sunkin, S.M., Oh, S.W., Zariwala, H.A., Gu, H., Ng, L.L., Palmiter, R.D.,  
739 Hawrylycz, M.J., Jones, A.R., et al. (2010). A robust and high-throughput Cre reporting and  
740 characterization system for the whole mouse brain. *Nat. Neurosci.* *13*, 133–140.
- 741 Matsukawa, S., Miwata, K., Asashima, M., and Michiue, T. (2015). The requirement of histone  
742 modification by PRDM12 and Kdm4a for the development of pre-placodal ectoderm and neural  
743 crest in *Xenopus*. *Dev. Biol.* *399*, 164–176.
- 744 Moore, A.W., Roegiers, F., Jan, L.Y., and Jan, Y. (2004). Conversion of neurons and glia to external-  
745 cell fates in the external sensory organs of *Drosophila hamlet* mutants by a cousin – cousin cell-  
746 type respecification. *623–628*.
- 747 Moqrich, A., Earley, T.J., Watson, J., Andahazy, M., Backus, C., Martin-zanca, D., Wright, D.E.,  
748 Reichardt, L.F., and Patapoutian, A. (2004). Expressing TrkC from the TrkA locus causes a subset  
749 of dorsal root ganglia neurons to switch fate. *7*, 812–818.
- 750 Nagy, V., Cole, T., Van Campenhout, C., Khoung, T.M., Leung, C., Vermeiren, S., Novatchkova, M.,  
751 Wenzel, D., Cikes, D., Polyansky, A.A., et al. (2015). The evolutionarily conserved transcription  
752 factor PRDM12 controls sensory neuron development and pain perception. *Cell Cycle* *14*, 1799–  
753 1808.

- 754 Nahorski, M.S., Chen, Y.C., and Woods, C.G. (2015). New Mendelian Disorders of Painlessness.  
755 *Trends Neurosci.* *38*, 712–724.
- 756 Renthal, W., Tochitsky, I., Yang, L., Cheng, Y., Li, E., Kawaguchi, R., Geschwind, D.H., and Woolf, C.J.  
757 (2020). Transcriptional Reprogramming of Distinct Peripheral Sensory Neuron Subtypes after  
758 Axonal Injury. *Neuron* 1–17.
- 759 Saini, A.G., Padmanabh, H., Sahu, J.K., Kurth, I., Voigt, M., and Singhi, P. (2017). Hereditary Sensory  
760 Polyneuropathy, Pain Insensitivity and Global Developmental Delay due to Novel Mutation in  
761 PRDM12 Gene. *Indian J. Pediatr.* *84*, 332–333.
- 762 Sakai, K., and Miyazaki, J. (1997). A transgenic mouse line that retains Cre recombinase activity in  
763 mature oocytes irrespective of the cre transgene transmission. *Biochem Biophys Res Commun*  
764 *237*, 318–324.
- 765 Sharma, N., Flaherty, K., Lezgiyeva, K., Wagner, D.E., Klein, A.M., and Ginty, D.D. (2020). The  
766 emergence of transcriptional identity in somatosensory neurons. *Nature* *577*.
- 767 Shimada, S.G., and LaMotte, R.H. (2008). Behavioral differentiation between itch and pain in mouse.  
768 *Pain* *139*, 681–687.
- 769 Sikandar, S., Minett, M.S., Millet, Q., Santana-Varela, S., Lau, J., Wood, J.N., and Zhao, J. (2018).  
770 Brain-derived neurotrophic factor derived from sensory neurons plays a critical role in chronic pain.  
771 *Brain* 1028–1039.
- 772 Smeyne, R.J., Klein, R., Schnappt, A., Long, L.K., Bryant, S., Lewin, A., Lira, S.A., and Barbacid, M.  
773 (1994). Severe sensory and sympathetic neuropathies in mice carrying a disrupted Trk/NGF  
774 receptor gene. *368*, 17–20.
- 775 Thelie, A., Desiderio, S., Hanotel, J., Quigley, I., Van Driessche, B., Rodari, A., Borromeo, M.D., Kricha,  
776 S., Lahaye, F., Croce, J., et al. (2015). Prdm12 specifies V1 interneurons through cross-repressive  
777 interactions with Dbx1 and Nkx6 genes in *Xenopus*. *Development* *142*, 3416–3428.
- 778 Trapnell, C., Hendrickson, D.G., Sauvageau, M., Goff, L., Rinn, J.L., and Pachter, L. (2013). Differential  
779 analysis of gene regulation at transcript resolution with RNA-seq. *Nat. Biotechnol.* *31*, 46–53.
- 780 Usoskin, D., Furlan, A., Islam, S., Abdo, H., Lönnerberg, P., Lou, D., Hjerling-Leffler, J., Haeggström,  
29

- 781 J., Kharchenko, O., Kharchenko, P. V., et al. (2014). Unbiased classification of sensory neuron  
782 types by large-scale single-cell RNA sequencing. *Nat. Neurosci.* 18, 145–153.
- 783 Vandewauw, I., De Clercq, K., Mulier, M., Held, K., Pinto, S., Van Ranst, N., Segal, A., Voet, T.,  
784 Vennekens, R., Zimmermann, K., et al. (2018). A TRP channel trio mediates acute noxious heat  
785 sensing. *Nature* 555, 662–666.
- 786 Wang, L., Bluske, K.K., Dickel, L.K., and Nakagawa, Y. (2011). Basal progenitor cells in the embryonic  
787 mouse thalamus - their molecular characterization and the role of neurogenins and Pax6. *Neural*  
788 *Dev.* 6, 35.
- 789 Wieskopf, J.S., Mathur, J., Limapichat, W., Post, M.R., Al-Qazzaz, M., Sorge, R.E., Martin, L.J., Zaykin,  
790 D. V., Smith, S.B., Freitas, K., et al. (2015). The nicotinic  $\alpha 6$  subunit gene determines variability in  
791 chronic pain sensitivity via cross-inhibition of P2X2/3 receptors. *Sci. Transl. Med.* 7.
- 792 Yang, C.-M., and Shinkai, Y. (2013). Prdm12 is induced by retinoic acid and exhibits anti-proliferative  
793 properties through the cell cycle modulation of P19 embryonic carcinoma cells. *Cell Struct. Funct.*  
794 38, 197–206.
- 795 Zhang, S., Sharif, S.M., Chen, Y.-C., Valente, E.-M., Ahmed, M., Sheridan, E., Bennett, C., and Woods,  
796 G. (2016). Clinical features for diagnosis and management of patients with PRDM12 congenital  
797 insensitivity to pain. *J. Med. Genet.* 1–3.
- 798 Zhou, X., Wang, L., Hasegawa, H., Amin, P., Han, B.-X., Kaneko, S., He, Y., and Wang, F. (2010).  
799 Deletion of PIK3C3/Vps34 in sensory neurons causes rapid neurodegeneration by disrupting the  
800 endosomal but not the autophagic pathway. *Proc. Natl. Acad. Sci. U. S. A.* 107, 9424–9429.
- 801

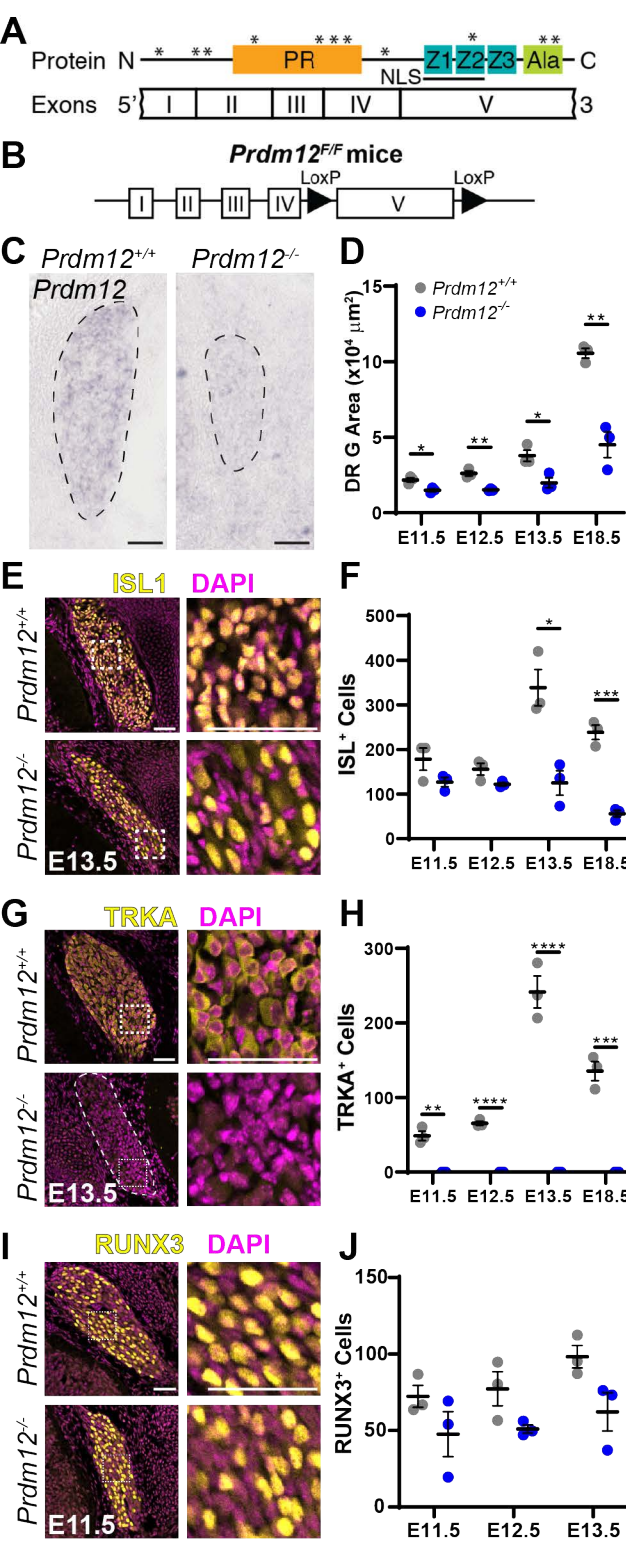

**Figure 1. DRGs from *Prdm12<sup>-/-</sup>* embryos are smaller and lack nociceptors.** (A) PRDM12 protein domain structure with corresponding exons. \*Human disease-causing mutations. (B) Schematic of the *Prdm12<sup>F/F</sup>* allele. (C) In situ hybridization with an exon V-specific probe verified deletion of this transcript in *Prdm12<sup>-/-</sup>* embryos. Scale bar 50  $\mu\text{m}$ . (D) Quantification of DRG area from immunofluorescence images reveals *Prdm12<sup>-/-</sup>* DRGs are smaller at all timepoints (E11.5  $p = 0.017$ , E12.5  $p = 0.003$ , E13.5  $p = 0.023$ , E18.5  $p = 0.003$ ). (E) Representative images of ISL1 immunohistochemistry, with inset shown on right. Scale bars 50  $\mu\text{m}$ . (F) Quantification reveals a similar number of ISL1<sup>+</sup> cells at E11.5 and E12.5 in control and KO tissue, but a significant reduction in counts at E13.5 ( $p = 0.012$ ) and E18.5 ( $p = 0.0005$ ) in KO embryos. (G) Representative images of TRKA immunohistochemistry, with inset shown on right. Scale bars 50  $\mu\text{m}$ . (H) Quantification reveals a complete absence of TRKA<sup>+</sup> precursors in *Prdm12<sup>-/-</sup>* embryos at all time points (E11.5  $p = 0.001$ , E12.5 and E13.5  $p < 0.0001$ , E18.5  $p = 0.0004$ ). (I) Representative images of RUNX3 immunohistochemistry, with inset shown on right. Scale bars 50  $\mu\text{m}$ . (J) Quantification reveals no significant difference between control and KO DRGs at any timepoint. For all graphs, a data point represents the average across 3 DRGs taken from the lumbar region of a single embryo. Results are presented as mean  $\pm$  SEM; statistical analysis performed with pairwise  $t$ -tests.

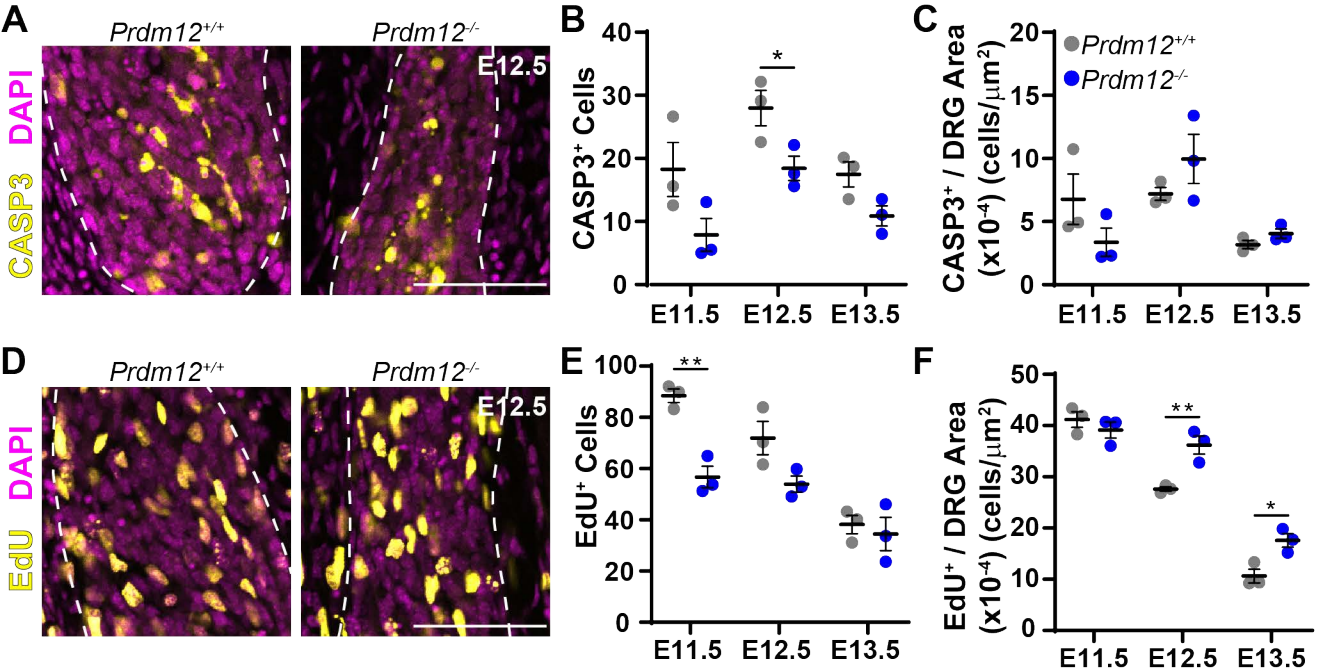

**Figure 2. Defects in proliferation but not cell death in *Prdm12*<sup>-/-</sup> mice.** (A) Representative images of cleaved caspase-3 immunohistochemistry in E12.5 embryos. Scale bar 50 μm. (B) Quantification reveals a small but significant reduction of CASP3<sup>+</sup> cells in *Prdm12*<sup>-/-</sup> embryos at E12.5 ( $p = 0.043$ ). (C) When normalized to DRG area, there is no significant difference in the number of CASP<sup>+</sup> cells at any time point. (D) Representative images of DRGs labeled with EdU just prior to collection at E11.5. (E) Quantification reveals a significant reduction in EdU-labeled cells at E11.5 ( $p = 0.003$ ) in *Prdm12*<sup>-/-</sup> DRGs. (F) When corrected for DRG size, counts indicate increased relative EdU labeling in *Prdm12*<sup>-/-</sup> DRGs at E12.5 ( $p = 0.009$ ) and E13.5 ( $p = 0.021$ ). For all graphs, a data point represents the average across 3 DRGs taken from the lumbar region of a single embryo. Results are presented as mean ± SEM; statistical analysis performed with pairwise t-tests.



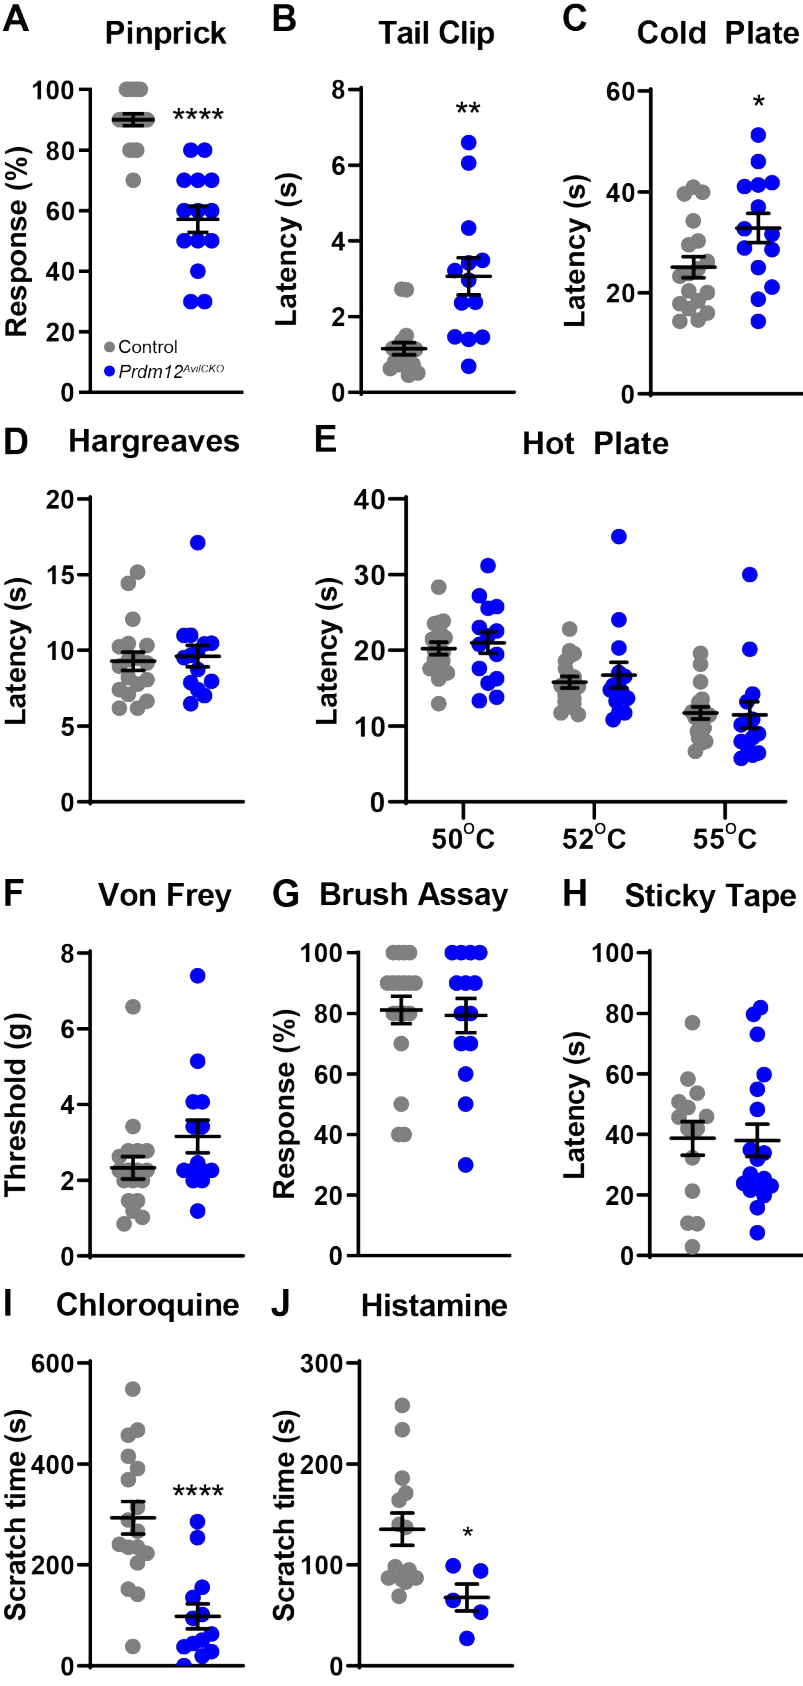

**Figure 3. *Prdm12<sup>Avi1CKO</sup>* mice have reduced sensation to mechanical and cold nociceptive stimuli, and chemical pruritogens.** (A-I) Panels show behavioral responses of *Prdm12<sup>Avi1CKO</sup>* mice (n= 14) and control littermates (n= 18); each group is split 50/50 M:F. (A) *Prdm12<sup>Avi1CKO</sup>* mice show reduced sensitivity to a sharp pin,  $p < 0.0001$ . (B, C) *Prdm12<sup>Avi1CKO</sup>* mice show a delayed response to a clip attached to the tail (B,  $p = 0.002$ ) and when placed on a cold plate (C, 0-5°C,  $p = 0.033$ ). (D, E) *Prdm12<sup>Avi1CKO</sup>* mice showed no differences in response to heat stimuli in the Hargreaves (D) or hot plate (E) assays. (F-H) Light touch is also normal in *Prdm12<sup>Avi1CKO</sup>* mice, which show similar withdrawal thresholds to von Frey hairs (F,  $p = 0.115$ ), responses to dynamic light touch (G), and latency to removal of a piece of tape applied to the plantar surface of the hindpaw (H). (I) *Prdm12<sup>Avi1CKO</sup>* mice show reduced scratch time following intradermal chloroquine injection in the nape of the neck,  $p < 0.0001$ . (J) Scratch time is similarly reduced in *Prdm12<sup>Avi1CKO</sup>* mice (n= 5) compared to control littermates (n= 14) following intradermal histamine injection in the nape of the neck,  $p = 0.029$ . All behavioral data analyzed by *t*-test; results are presented as mean  $\pm$  SEM.

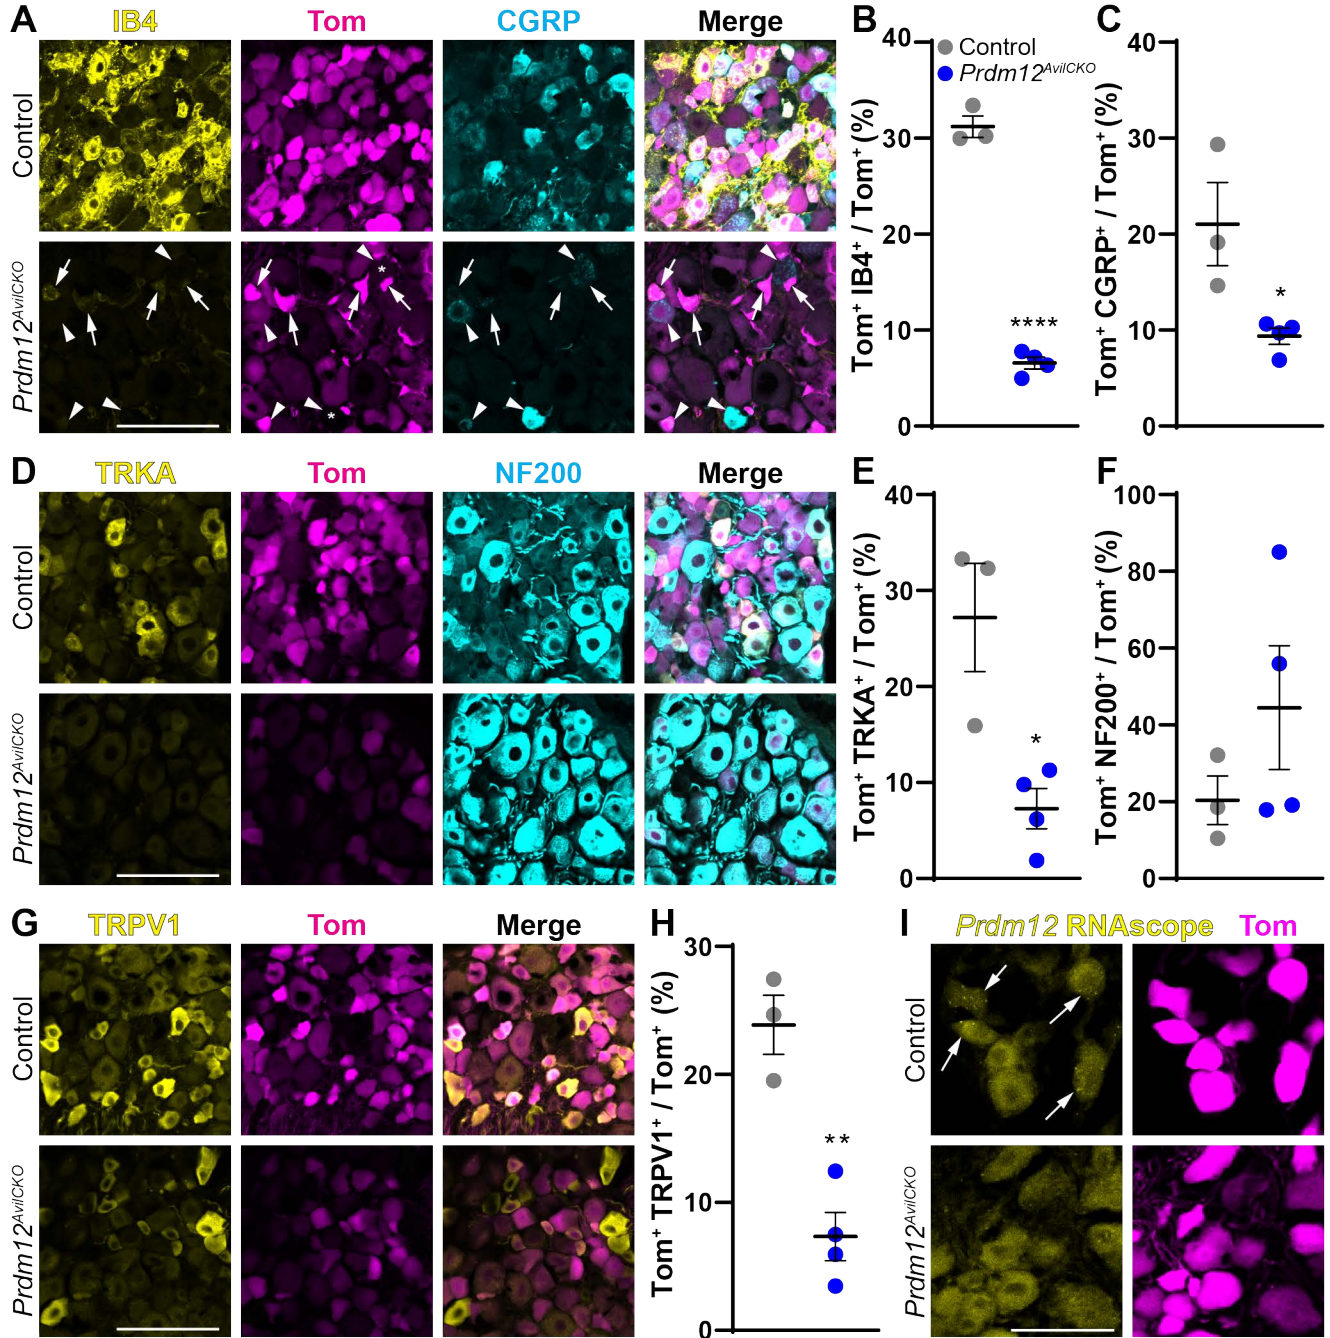

**Figure 4. Nociceptor populations are reduced in *Prdm12<sup>AviCKO</sup>* mice.** (A) Representative image showing number and intensity of IB4<sup>+</sup> (arrows) and CGRP<sup>+</sup> (arrowheads) nociceptors are reduced in *Prdm12<sup>AviCKO</sup>* DRGs. Scale bar 100  $\mu$ m. (B, C) Quantification of reduction in IB4<sup>+</sup> (B,  $p < 0.0001$ ) and CGRP<sup>+</sup> (C,  $p = 0.027$ ) nociceptors as a percent of the total Tom<sup>+</sup> population of sensory neurons. (D) Representative image of TRKA<sup>+</sup> nociceptors and NF200<sup>+</sup> myelinated neurons in *Prdm12<sup>AviCKO</sup>* and control mice. Scale bar 100  $\mu$ m. (E) Quantification showing significant reduction of TRKA<sup>+</sup> nociceptors,  $p = 0.0135$ . (F) Quantification of NF200<sup>+</sup> neurons showing a wide range in *Prdm12<sup>AviCKO</sup>* mice, but no significant change from control littermates,  $p = 0.278$ . (G, H) Representative image (G) and quantification (H) of the reduction in number and intensity of TRPV1<sup>+</sup> nociceptors,  $p = 0.0025$ . Scale bar 100  $\mu$ m. (I) RNAscope using exon V-specific probes confirmed knockout of *Prdm12* from mutant DRGs. All analysis was completed using DRGs from lumbar levels 2 through 5; each data point represents the average count across 3 DRGs from control ( $n = 3$ ) or *Prdm12<sup>AviCKO</sup>* ( $n = 4$ ) mice taken after behavior analysis around 10 weeks of age. Scale bar 50  $\mu$ m. All quantification analyzed by t-test; results are presented as mean  $\pm$  SEM.

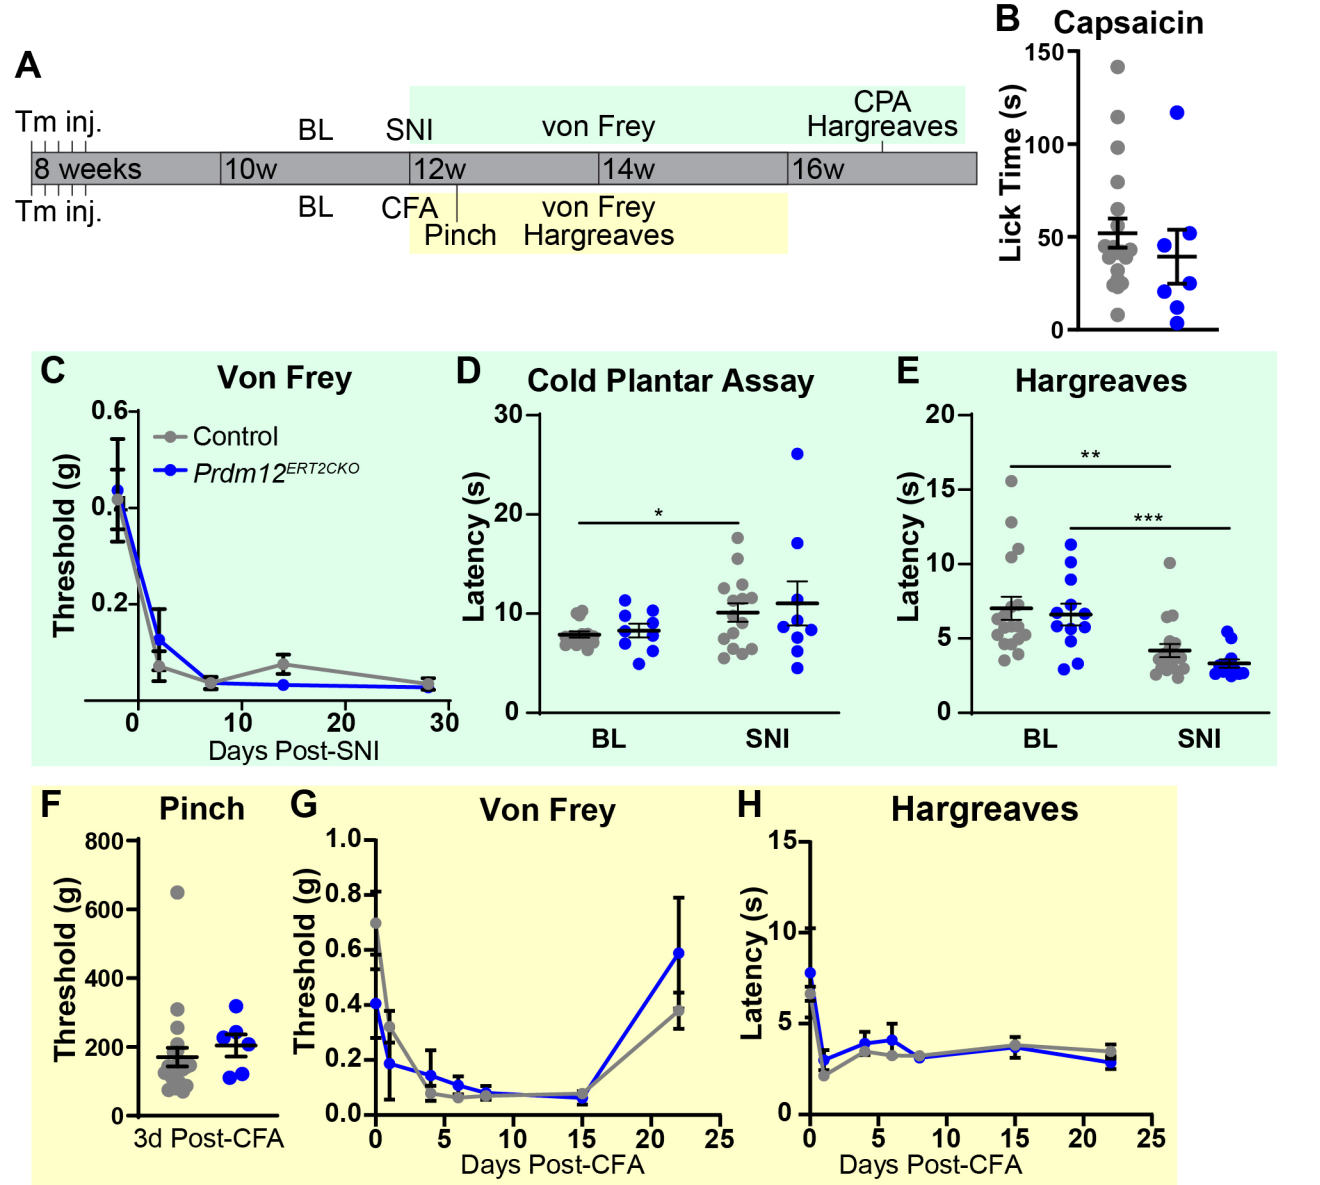

**Figure 5. Knockout of *Prdm12* in adulthood does not reduce pain sensitivity in naïve or injured mice.** (A) Schematic showing experimental timeline. (B) No difference was observed in the time spent licking after capsaicin injection into the hindpaw between *Prdm12*<sup>AVIERT2CKO</sup> ( $n = 7$ , 3:4 M:F) and control ( $N=19$ , 11:8 M:F) mice. (C-E) Behavioral results before and after SNI. (C) Time course of withdrawal thresholds for *Prdm12*<sup>AVIERT2CKO</sup> ( $n = 12$ , 5:7 M:F) and control ( $n = 18$ , 8:10 M:F) mice showing both groups developed mechanical allodynia following SNI. (D) Responses of *Prdm12*<sup>AVIERT2CKO</sup> mice ( $n = 9$ , 5:4 M:F) to cold plantar assay did not differ significantly from control ( $n = 15$ , 7:8 M:F) at baseline or 4 weeks post-SNI. Control mice did show a slight increase in latency to response following SNI,  $p = 0.038$ . (E) Both groups experienced heat hyperalgesia four weeks post-SNI, but did not differ from each other at either time point. Same  $n$  as (C), control  $p = 0.004$ , *Prdm12*<sup>AVIERT2CKO</sup>  $p = 0.0009$ . (F-H) Behavioral results following CFA injection. (F) No difference was observed in the withdrawal threshold to paw pinch between *Prdm12*<sup>AVIERT2CKO</sup> ( $n = 6$ , 3:3 M:F) and control ( $n = 21$ , 12:9 M:F), which was tested 3 days after CFA injection. Note that withdrawal thresholds are several-fold higher due to the larger area over which pressure is applied with the rodent pincher compared to von Frey filaments. (G) Time course of withdrawal thresholds showing both groups developed tactile allodynia following CFA, and recovered over the same time period. Same  $n$  as (F). (H) Both groups developed heat hyperalgesia following CFA injection. Same  $n$  as (F). Statistical analysis by 2-way ANOVA for (C), (G), (H); pairwise t-tests for other data sets.

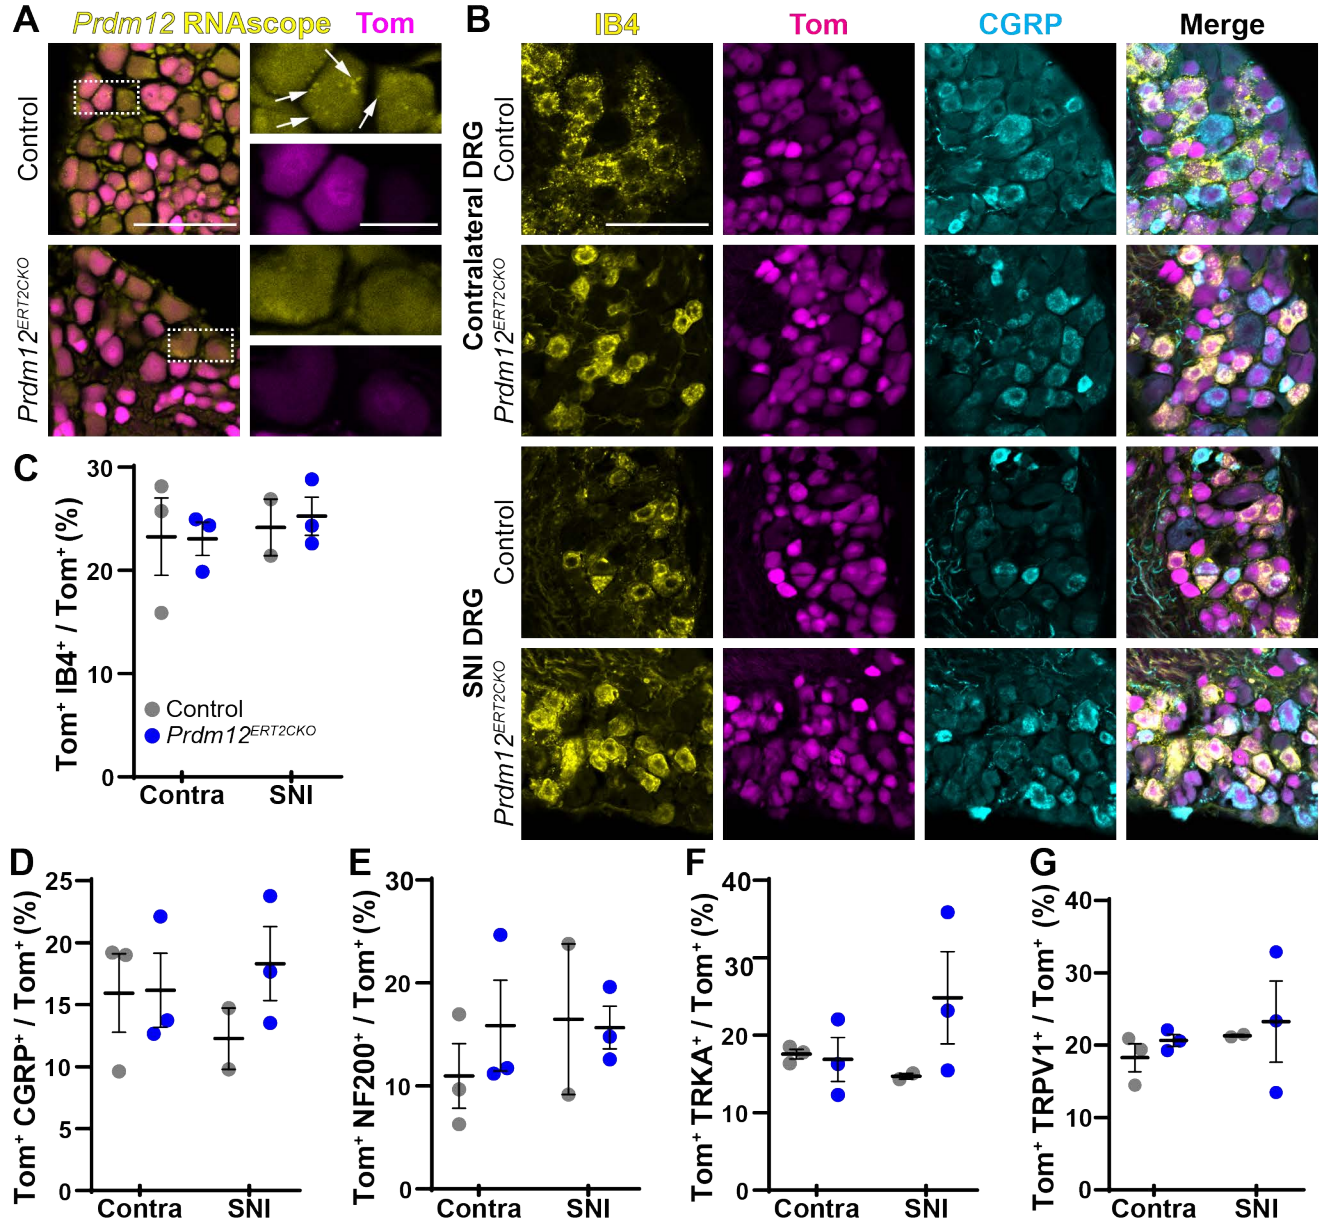

**Figure 6. DRG nociceptor populations are unchanged following *Prdm12* knockout and/or SNI.** (A) Exon V-specific RNAscope verified loss of mRNA transcript in *Prdm12*<sup>AVIERT2CKO</sup> mice. Scale bar 100  $\mu$ m. Inset arrows indicate mRNA puncta detected by the probe; inset scale bar 25  $\mu$ m. (B) Representative images of lumbar DRGs from control and *Prdm12*<sup>AVIERT2CKO</sup> DRGs contralateral to and ipsilateral to SNI with immunohistochemistry for IB4 and CGRP. Scale bar 100  $\mu$ m. (C-G) Quantification of these images revealed no changes in the number of IB4<sup>+</sup> (C), CGRP<sup>+</sup> (D), NF200<sup>+</sup> (E), TRKA<sup>+</sup> (F), or TRPV1<sup>+</sup> (G) neurons after SNI in either control or *Prdm12*<sup>AVIERT2CKO</sup> mice, or between these two groups at either time point. Each data point represents the average count across 3 DRGs taken from the L2-L5 region of  $n = 2$  control mice post-SNI, or  $n = 3$  mice for all other conditions. DRGs were collected after behavior assessment, at 18 weeks. Graphs show mean  $\pm$  SEM; statistical analysis with pairwise t-tests.

# A Prdm12<sup>ERT2CKO</sup>

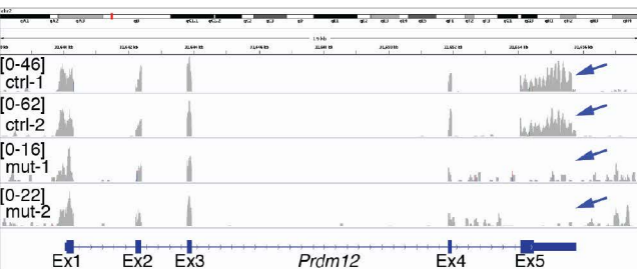

# B DEGs in Nociceptors

| Symbol          | WT (FPKM) | MUT (FPKM) | Log2 (FC) | p_value |
|-----------------|-----------|------------|-----------|---------|
| <i>Prdm12</i>   | 9.13      | 1.27       | -2.84     | 5.0E-05 |
| <i>Slc26a7</i>  | 13.38     | 3.65       | -1.87     | 5.0E-05 |
| <i>Dapl1</i>    | 45.13     | 12.53      | -1.85     | 5.0E-05 |
| <i>Slc9b2</i>   | 3.60      | 1.01       | -1.83     | 1.0E-04 |
| <i>Col25a1</i>  | 3.21      | 0.90       | -1.83     | 5.0E-05 |
| <i>Nnat</i>     | 237.28    | 67.55      | -1.81     | 5.0E-05 |
| <i>Abca4</i>    | 1.48      | 0.43       | -1.80     | 1.5E-04 |
| <i>Slc9a2</i>   | 10.98     | 3.17       | -1.79     | 5.0E-05 |
| <i>Wnt16</i>    | 6.53      | 2.05       | -1.67     | 2.0E-04 |
| <i>Pttg1</i>    | 23.80     | 7.65       | -1.64     | 5.0E-05 |
| <i>Illdr2</i>   | 12.46     | 4.16       | -1.58     | 5.0E-05 |
| <i>Fmod</i>     | 88.88     | 29.73      | -1.58     | 5.0E-05 |
| <i>Slc26a2</i>  | 12.66     | 4.24       | -1.58     | 5.0E-05 |
| <i>Thsd4</i>    | 11.78     | 3.95       | -1.58     | 5.0E-05 |
| <i>Epha3</i>    | 2.85      | 0.97       | -1.56     | 2.0E-04 |
| <i>Slc16a12</i> | 6.85      | 2.35       | -1.54     | 5.0E-05 |
| <i>Kl</i>       | 2.82      | 0.97       | -1.53     | 3.0E-04 |
| <i>Egln3</i>    | 18.75     | 6.54       | -1.52     | 5.0E-05 |
| <i>Slc16a11</i> | 14.65     | 5.16       | -1.51     | 4.0E-04 |
| <i>Cpm</i>      | 3.54      | 1.25       | -1.50     | 1.0E-04 |
| <i>Ocel1</i>    | 11.25     | 4.23       | -1.41     | 2.0E-04 |
| <i>Aifm3</i>    | 17.20     | 6.58       | -1.39     | 5.0E-05 |
| <i>Mapk4</i>    | 11.98     | 4.66       | -1.36     | 5.0E-05 |
| <i>Epha4</i>    | 3.19      | 1.26       | -1.34     | 1.5E-04 |
| <i>Igfbp2</i>   | 100.58    | 40.23      | -1.32     | 5.0E-05 |
| <i>Adamts13</i> | 5.14      | 2.07       | -1.31     | 5.0E-05 |
| <i>Slc6a13</i>  | 72.65     | 29.39      | -1.31     | 5.0E-05 |
| <i>Tmem64</i>   | 53.56     | 21.74      | -1.30     | 5.0E-05 |
| <i>Atp1a2</i>   | 323.52    | 133.60     | -1.28     | 5.0E-04 |
| <i>Slc6a9</i>   | 16.53     | 6.95       | -1.25     | 5.0E-05 |
| <i>Pde1a</i>    | 21.78     | 9.44       | -1.21     | 5.0E-05 |
| <i>Gpr4</i>     | 9.94      | 4.33       | -1.20     | 3.0E-04 |
| <i>Aldh1a1</i>  | 114.99    | 51.24      | -1.17     | 5.0E-05 |
| <i>Ramp1</i>    | 16.55     | 7.60       | -1.12     | 5.0E-05 |
| <i>Ppp1r1a</i>  | 94.22     | 43.70      | -1.11     | 5.0E-05 |
| <i>Isyna1</i>   | 101.98    | 47.51      | -1.10     | 1.0E-04 |
| <i>Rapgef5</i>  | 7.71      | 3.59       | -1.10     | 1.5E-04 |
| <i>Trpm3</i>    | 8.27      | 3.86       | -1.10     | 2.0E-04 |
| <i>Perp</i>     | 45.47     | 21.62      | -1.07     | 5.0E-05 |
| <i>Arhgap20</i> | 3.56      | 1.69       | -1.07     | 5.0E-04 |
| <i>Thbd</i>     | 94.08     | 44.90      | -1.07     | 1.0E-04 |
| <i>Angpt1</i>   | 7.25      | 3.48       | -1.06     | 3.5E-04 |
| <i>Moxd1</i>    | 19.24     | 9.56       | -1.01     | 1.0E-04 |
| <i>Chrna6</i>   | 12.12     | 25.46      | 1.07      | 1.5E-04 |

**Figure 7. Transcriptional changes in *Prdm12*<sup>AvilERT2CKO</sup> mice.** (A) Sequencing reads from two control (ctrl-1 and 2) and two mutant (mut-1 and 2) samples show that exon V is specifically knocked out (arrows). (B) 43 genes expressed in nociceptors are decreased in the mutant (negative log<sub>2</sub>(Fold Change)), and 1 gene is increased (*Chrna6*). FPKM values are averaged across both samples.

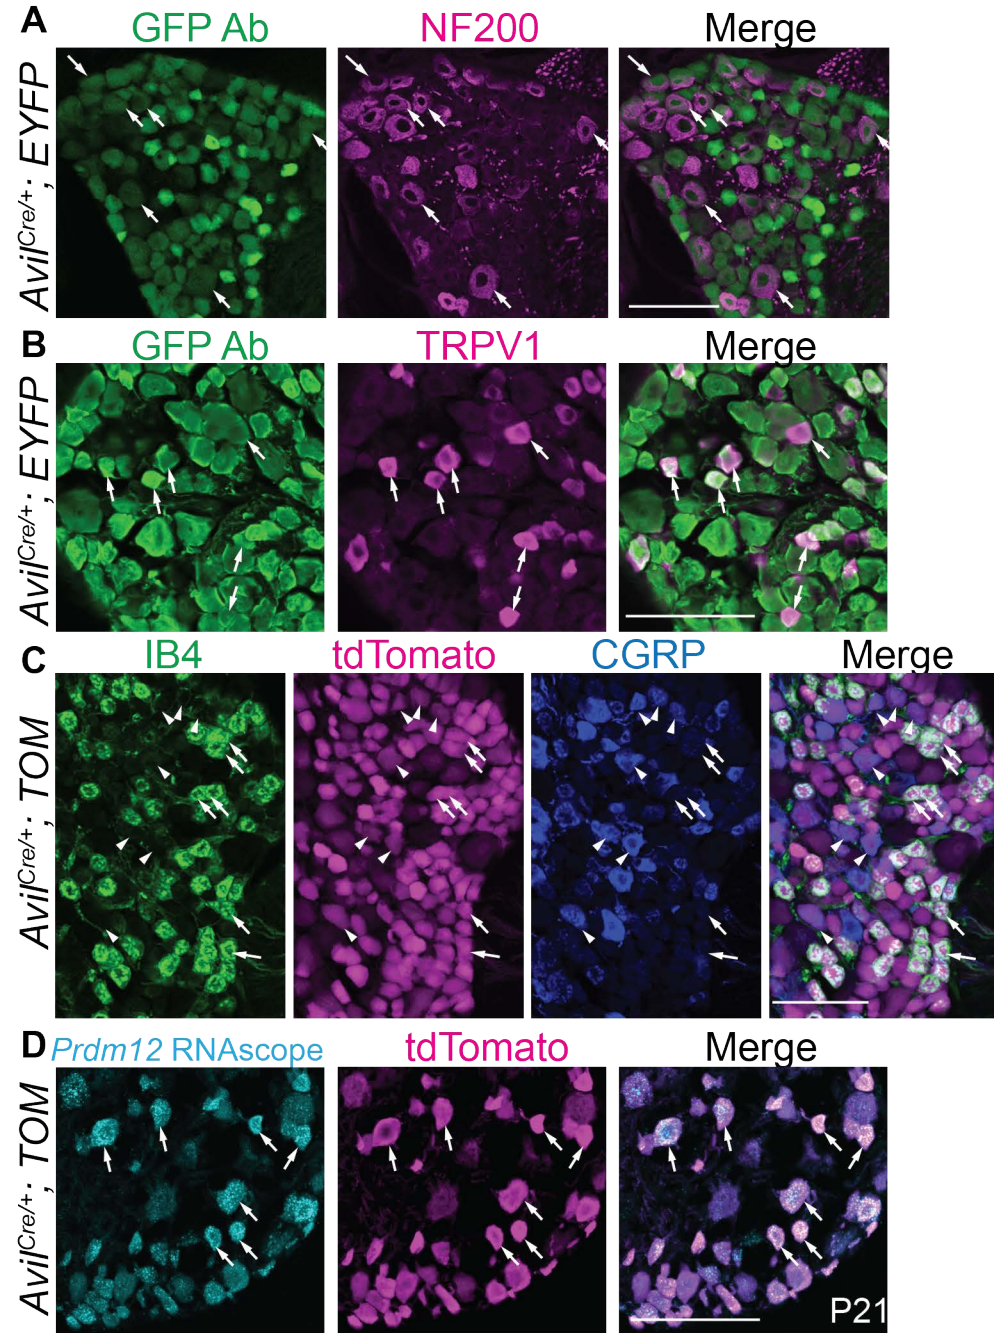

**Supplemental Figure 1. Characterization of a sensory neuron specific CRE line.** *Avij<sup>Cre/+</sup>* crossed to a CRE-dependent reporter identifies DRG neurons expressing CRE recombinase. (A-C) *Avij<sup>Cre/+</sup>*-lineage neurons colocalize with myelinated DRG neurons (A, NF200<sup>+</sup>, arrows) unmyelinated TRPV1<sup>+</sup> neurons (B, arrows), and nonpeptidergic (C, IB4<sup>+</sup>, arrows) and peptidergic (C, CGRP<sup>+</sup>, arrowheads) C-fibers. (D) The *Avij<sup>Cre/+</sup>*-lineage also colocalizes with *Prdm12* mRNA expression (arrows, RNAscope). Scale bars 100  $\mu$ m.
